**TITLE:** Dense cortical input to the rostromedial tegmental nucleus mediates aversive signaling

Elizabeth J Glover, PhD<sup>1\*</sup>, E Margaret Starr<sup>1</sup>, Andres Gascon<sup>1</sup>, Kacey Clayton-Stiglbauer<sup>1</sup>, Christen L Amegashie<sup>1</sup>, Alyson H Selchick<sup>2</sup>, Dylan T Vaughan<sup>2</sup>, Wesley N Wayman, PhD<sup>2</sup>, John J Woodward, PhD<sup>2</sup>, and L Judson Chandler, PhD<sup>2</sup>

<sup>1</sup>Center for Alcohol Research in Epigenetics, Department of Psychiatry, University of Illinois at Chicago

<sup>2</sup>Department of Neuroscience, Medical University of South Carolina

**\*Corresponding author:**

Elizabeth J Glover, PhD

Center for Alcohol Research in Epigenetics

Department of Psychiatry

University of Illinois at Chicago

1601 W Taylor St, MC912, Rm 418

Chicago, IL 60612

[ejglover@uic.edu](mailto:ejglover@uic.edu)

This work was supported by NIH grants AA022836 (EJG), AA022701 (LJC), AA019967 (LJC), AA027706 (LJC), DA013951 (JJW), DA042518 (WNW).

1 **ABSTRACT**

2 The rostromedial tegmental nucleus (RMTg) encodes negative reward prediction error (RPE) and  
3 plays an important role in guiding behavioral responding to aversive stimuli. While initial studies  
4 describing the RMTg revealed the presence of cortical afferents, the density and distribution of  
5 this input has not been explored in detail. In addition, the functional consequences of cortical  
6 modulation of RMTg signaling are only just beginning to be investigated. The current study  
7 anatomically and functionally characterizes cortical input to the RMTg in rats. Findings from this  
8 work reveal dense input spanning the entire medial prefrontal cortex (PFC) as well as the  
9 orbitofrontal cortex and anterior insular cortex. Afferents were most dense in the dorsomedial  
10 subregion of the PFC (dmPFC), an area which has also been implicated in both RPE signaling  
11 and aversive responding. RMTg-projecting dmPFC neurons originate in layer V and collateralize  
12 extensively throughout the brain. In-situ mRNA hybridization further revealed that neurons in this  
13 circuit are predominantly D1 receptor-expressing with a high degree of D2 receptor colocalization.  
14 Optogenetic stimulation of dmPFC terminals in the RMTg drives avoidance, and cFos expression  
15 is enhanced in this neural circuit during exposure to aversive stimuli. Exposure to such aversive  
16 stimuli results in significant physiological and structural plasticity suggestive of a loss of top-down  
17 modulation of RMTg-mediated signaling. Altogether, these data reveal the presence of a  
18 prominent cortico-subcortical projection involved in adaptive behavioral responding and provide  
19 a foundation for future work aimed at exploring alterations in circuit function in diseases  
20 characterized by deficits in cognitive control over the balance between reward and aversion.

21

22 **KEYWORDS:** Prefrontal cortex, Insular cortex, aversion, conditioned fear

23

24 **INTRODUCTION**

25 Adaptive responding, in which past outcomes shape decision-making and future behaviors, is  
26 critical for survival. Impaired decision-making and maladaptive behaviors are common to a  
27 number of neuropsychiatric diseases and contribute significantly to harm and illness severity.  
28 Consequently, substantial effort has been put forth to identify the neural mechanisms governing  
29 such motivated behavior.

30

31 In the early 1980s, Corbett & Wise (1980) found that intracranial self-stimulation was most robust  
32 in rats with electrodes implanted in the ventral tegmental area (VTA) thereby uncovering a role  
33 for midbrain dopamine neurons in reward processing. Building upon this work, subsequent studies  
34 revealed that the activity of midbrain dopamine neurons encode a reward prediction error (RPE)  
35 with outcomes that are greater than expected producing a positive RPE associated with increased  
36 VTA dopamine neuron activity, and outcomes that are worse than expected producing a negative  
37 RPE associated with decreased VTA dopamine neuron activity (Schultz, 1986; Schultz et al.,  
38 1997). The neural circuitry driving RPE calculations within the VTA remains an area of intense  
39 investigation. To date, research suggests that positive RPE signals in the VTA are driven, at least  
40 in part, by excitatory input arising from the pedunculo pontine tegmental nucleus (PPTg) (Mena-  
41 Segovia and Bolam, 2017) with possible additional involvement from neurochemically  
42 heterogenous afferents originating in the lateral hypothalamus (Nieh et al., 2015; Sharpe et al.,  
43 2017). Non-human primate studies suggested that the lateral habenula (LHb) played an important  
44 role in negative RPE signaling (Matsumoto and Hikosaka, 2007). However, this work presented  
45 somewhat of a paradox as previous studies had demonstrated that the LHb provides  
46 monosynaptic glutamatergic input to VTA dopamine neurons (Omelchenko et al., 2009) making  
47 it difficult to reconcile how this projection could facilitate a depression in phasic dopamine activity  
48 during presentation of aversive stimuli.

49

50 The solution to this paradox presented itself when two independent laboratories identified a  
51 previously unknown brain region called the rostromedial tegmental nucleus (RMTg), or tail of the  
52 VTA (Kaufling et al., 2009; Jhou et al., 2009b). Located immediately posterior to the VTA, both  
53 groups showed that the RMTg is primarily comprised of GABAergic neurons that receive dense  
54 input from the LHB and exert inhibitory control over monoaminergic and cholinergic midbrain  
55 nuclei including VTA dopamine neurons. Subsequent work found that RMTg activity increases in  
56 response to aversive stimuli of various sensory modalities (Jhou et al., 2009a; Li et al., 2019a)  
57 and that loss of RMTg function enhances active (e.g., escape) while reducing passive (e.g.,  
58 freezing) responding in tests measuring fear and learned helplessness (Jhou et al., 2009a; Elmer  
59 et al., 2019). Circuit-specific approaches have further revealed that stimulation of dopamine-  
60 projecting RMTg neurons produces avoidance in a real-time place preference test and increases  
61 immobility in the forced swim test (St Laurent et al., 2020; Sun et al., 2020). In addition, using in-  
62 vivo electrophysiology, Hong et al. (2011) demonstrated that inhibition of VTA dopamine neurons  
63 in response to aversive stimuli is driven via activation of a disynaptic circuit comprised of  
64 glutamatergic LHB neurons that provide input to VTA-projecting GABAergic neurons in the RMTg.  
65 Collectively, these studies suggest that the LHB-RMTg-VTA circuit plays a critical role in encoding  
66 negative RPE thereby guiding behavioral responding to aversive stimuli.

67

68 The prefrontal cortex (PFC) integrates incoming multisensory information with previous  
69 experience to provide top-down inhibitory control over behavior and guide goal-directed  
70 responding. Interestingly, subregions spanning the dorsomedial PFC (dmPFC), which includes  
71 the anterior cingulate cortex (ACC) and prelimbic (PL) PFC in rats, corresponding to Broadman's  
72 area 24 and 32 in humans, respectively, exhibit a number of functional similarities with the RMTg.  
73 For example, similar to the RMTg, neuronal activity in the PL PFC increases during exposure to  
74 aversive stimuli (Burgos-Robles et al., 2009) and loss of PL function reduces passive fear  
75 responding (Corcoran and Quirk, 2007). In addition, the activity in the dmPFC, and ACC in



76 particular, has been heavily implicated in RPE signaling (Alexander and Brown, 2019). As with  
77 the dmPFC, the rodent ventromedial PFC (vmPFC) is also comprised of two subregions. The  
78 more ventral rodent infralimbic (IL) PFC, which is thought to be homologous with Broadman's  
79 area 25 in humans, is well-characterized as frequently exerting opposing functions to the more  
80 dorsal PL mPFC (Peters et al., 2009; Gourley and Taylor, 2016) with activity in this region  
81 facilitating extinction of responses driven by PL PFC activity (Do-Monte et al., 2015). The dorsal  
82 peduncular cortex (DP) makes up the ventral-most portion of the vmPFC. While some have  
83 suggested the DP exhibits functional overlap with the IL PFC (Peters et al., 2009), very few studies  
84 have examined the DP directly and the human homolog of this region is, to date, unknown.

85  
86 It is of interest that initial anatomical characterization of the RMTg revealed the presence of  
87 cortical afferents to the RMTg, including some that arose from the mPFC (Kaufling et al., 2009;  
88 Jhou et al., 2009b). However, the anatomy and function of these inputs have not been well-  
89 characterized as much of the research aimed at investigating the role of RMTg-associated neural  
90 circuits in aversive signaling has focused on the LHb-RMTg-VTA projection. The present study  
91 begins to fill this gap by anatomically and functionally characterizing cortical inputs to the RMTg  
92 with particular focus on those arising from the dmPFC given the functional overlap it shares with  
93 the RMTg. Our findings reveal the presence of dense input spanning a number of functionally  
94 distinct regions of the prefrontal and insular cortices and uncover a role for RMTg-projecting  
95 dmPFC neurons in top-down control over RMTg-mediated aversive signaling.

96

## 97 **MATERIALS & METHODS**

### 98 **Animals**

99 For all experiments, adult male Long-Evans rats (P60 upon arrival, Envigo Laboratories,  
100 Indianapolis, IN) were individually housed in standard polycarbonate cages. The vivarium was  
101 maintained on a 12:12 reverse light-dark cycle with lights off at 09:00. Rats were habituated to

102 the vivarium for at least one week before beginning experiments. All rats were provided with  
103 Teklad 2918 (Envigo) standard chow and water *ad libitum*. All experiments were approved by the  
104 Institutional Animal Care and Use Committees at the Medical University of South Carolina and  
105 University of Illinois at Chicago and adhered to the guidelines put forth by the NIH (National  
106 Research Council, 2011).

107

### 108 **Stereotaxic surgery**

109 Rats undergoing stereotaxic surgery were induced and maintained under a surgical plane of  
110 anesthesia using isoflurane (1-5%). Intracranial injections were made with back-filled custom  
111 glass pipettes connected to a nanojector (Drummond Scientific Company, Broomall, PA, USA) or  
112 a 200  $\mu$ L Hamilton syringe operated using a motorized pump (WPI, Inc, Sarasota, FL, USA). For  
113 tract tracing experiments, 100 nL 0.5% Cholera toxin B (CtB; Sigma Aldrich, St Louis, MO, USA)  
114 or 200 nL green fluorescent retrobeads (Lumafuor, Durham, NC, USA) were unilaterally injected  
115 into the RMTg (AP: -7.3; ML: +1.4; DV: -8.0 from skull; 6° lateral) at a rate of ~30 nL/s. For  
116 optogenetics experiments, rats were bilaterally injected with 500 nL of AAV2-hSyn-hChR2-  
117 (H134R)-eYFP-WPRE-pA (UNC Vector Core, Chapel Hill, NC, USA) into the dmPFC (AP: +3.2;  
118 ML:  $\pm$ 0.6; DV: -3.5 from skull) or lateral habenula (LHb; AP: -3.6; ML:  $\pm$ 1.2; DV: -4.1 from dura; 6°  
119 lateral) at a rate of 1-3 nL/s. During the same surgery, rats were implanted with custom-made 200  
120  $\mu$ m optic fiber implants targeting either the RMTg (AP: -7.3; ML:  $\pm$ 2.1; DV: -7.9 from skull; 10°  
121 lateral) or VTA (AP: -5.6; ML:  $\pm$ 1.4; DV: -7.8 from skull; 6° lateral). Implants were secured with  
122 dental cement. An intersectional, dual-virus approach was used to investigate the extent of  
123 dmPFC-RMTg collateralization and structural plasticity in dmPFC-RMTg neurons following  
124 exposure to aversive stimuli. For these experiments, rats were unilaterally injected with 500 nL of  
125 either AAVretro-Cre (gift from Janelia Farms, Ashburn VA, US) or AAV2retro-pmSyn1-EBFP-Cre  
126 (Addgene, Watertown, MA, USA) into the RMTg (AP: -7.3; ML: +1.4; DV: -8.0 from skull; 6° lateral)

127 and 500 nL of AAV8.2-hEF1alpha-DIO-SYP-EYFP (Rachel Neve, MIT Vector Core) into the  
128 dmPFC (AP: +3.2; ML: +0.6; DV: -3.5 from skull) at a rate of 1-3 nL/s.

129

### 130 **Cell density analysis**

131 Rats unilaterally injected with CtB into the RMTg (n=9) were transcardially perfused with  
132 phosphate buffered saline (PBS) followed by 4% paraformaldehyde (PFA). Brains were  
133 immersion fixed overnight in 4% PFA, cryoprotected in 30% sucrose, and stored at -80 °C until  
134 ready for processing for microscopic analysis. Brains were sliced at 40 µm on a cryostat held at -  
135 20 °C. Slices containing the PFC and RMTg were labeled for CtB and NeuN using standard  
136 immunofluorescence procedures. In brief, slices were incubated in 50% (v/v) methanol for 30 min  
137 followed by incubation in 1% H<sub>2</sub>O<sub>2</sub>. Permeabilization was enhanced by incubation in 0.4% Triton-  
138 X in PBS followed by incubation in primary antibodies in PBS containing 0.2% Triton-X overnight  
139 at 4 °C (CtB 1°: 1:500, List Biological Laboratories #703; NeuN 1°: 1:500, EMD Millipore,  
140 MAB377). The tissue was then incubated with secondary antibodies for 2 h at room temperature  
141 (1:250, Jackson ImmunoResearch), rinsed in PBS, and mounted onto SuperFrost plus charged  
142 slides before being coverslipped with Fluoromount mounting medium (Sigma Aldrich). Images  
143 were acquired at 10X and tiled using an EVOS FL Auto microscope. Anatomical boundaries and  
144 rostrocaudal level of each PFC slice were determined by aligning the acquired microscopic  
145 images with atlas schematics generated using Paxinos & Watson (2007) in GIMP. ImageJ was  
146 used to apply a bandpass filter to Fourier-transformed images after which CtB+ and NeuN+ cells  
147 were automatically identified by searching for maximum intensity points.

148

### 149 **Cell-type analysis**

150 Adjacent tissue from that used in the cell density analysis experiments (n=3) was used to evaluate  
151 whether RMTg-projecting cortical neurons were glutamatergic or GABAergic projection neurons.  
152 Slices containing the PFC were labeled for CtB and the glutamatergic marker, CaMKII $\alpha$ , or CtB

153 and the GABAergic marker, GAD67, using the same immunofluorescence procedures described  
154 above (CaMKII $\alpha$  1°: 1:3,000, Invitrogen MA1048; GAD67 1°: 1:3,000, EMD Millipore MAB5406).  
155 Images of labeling in the dmPFC were acquired at 10X using a Zeiss AxioImager.M2 microscope.  
156 CtB-, CaMKII $\alpha$ -, and GAD67-labeled cell bodies were counted manually in each image using  
157 ImageJ. Cell counts were averaged across five slices spanning the rostrocaudal extent of the  
158 dmPFC for each rat and the ratio of cells labeled with each cell-type marker and CtB relative to  
159 all CtB-labeled neurons was calculated.

160

### 161 **Collaterals analysis**

162 A dual-virus, intersectional approach was used to label RMTg-projecting dmPFC neurons. After  
163 waiting at least eight weeks for optimal viral transduction and transgene expression, rats were  
164 euthanized and brains harvested using the same procedures described above. Brains were sliced  
165 on a cryostat at 40  $\mu$ m and eYFP signal was amplified using avidin-biotin immunohistochemistry  
166 procedures as previously published (Glover et al., 2016; GFP Abcam, ab290; 1:10,000). Brains  
167 were visually inspected from the rostral tip of the PFC to the rostral cerebellum for eYFP+ terminal  
168 labeling. Areas with noticeable labeling were imaged at 10X on a Zeiss AxioImager.M2  
169 microscope. Images were flat field corrected and terminal density was analyzed by measuring the  
170 percent-stained area relative to total area using ImageJ. Analysis was performed on four slices  
171 spanning the rostrocaudal extent of each region and averaged together to arrive at a single data  
172 point for each region. Analysis of secondary somatosensory cortex and dorsal hippocampus were  
173 included as negative controls.

174

### 175 **Real-time place preference testing**

176 After at least eight weeks to allow for sufficient viral transduction and transgene expression, rats  
177 were tested for real-time place preference using procedures adapted from previously published  
178 work (Stamatakis and Stuber, 2012). Rats were habituated to the tethering procedure for at least

179 three days prior to testing. Testing was performed in an unbiased, custom-made apparatus  
180 consisting of two contextually distinct compartments. On day one, rats were connected to a patch  
181 cable connected to a 473 nm laser and allowed to freely explore the apparatus for 20 min. Light  
182 was delivered immediately upon entry into one compartment of the apparatus at 10 mW intensity  
183 and 60 Hz for the duration of time spent in that compartment. Light delivery was terminated upon  
184 entry into the opposite compartment. To confirm that behavioral responding was light-mediated,  
185 rats were re-tested 24 hours later using identical procedures except that the compartment  
186 associated with light delivery was reversed. Time spent in each compartment was quantified from  
187 video recordings made with a camera mounted above the testing apparatus using Ethovision  
188 (Noldus, Leesburg, VA, USA).

189

#### 190 **cFos induction following aversive stimuli**

191 cFos induction was measured in RMTg-projecting mPFC neurons following exposure to aversive  
192 stimuli using procedures adapted from Jhou et al. (2009a). Rats were allowed at least one week  
193 to recover following stereotaxic injection of CtB into the RMTg before beginning testing. All rats  
194 underwent three days of habituation during which they were tethered and could freely explore a  
195 standard operant testing apparatus (Med Associates, St Albans, VT, USA). The house light was  
196 illuminated for the duration of each habituation session and all subsequent sessions. On day four,  
197 rats in the Context (control) group were euthanized 90 min after an identical 20 min habituation  
198 session. Rats in the Shock group were euthanized 90 min after presentation of a series of 10 foot  
199 shocks (0.5 mA, 0.5 s duration, 60 s inter-stimulus interval) over the course of a 20 min testing  
200 session beginning 60 s after the start of the session. Rats in the Shock-paired group underwent  
201 standard fear conditioning over two consecutive days where tone (2.9 kHz, 65 dB, 20 s duration)  
202 presentation co-terminated with foot shock (0.5 mA, 0.5 s duration). Two tone-shock pairings were  
203 presented 20 min apart over the course of each 60 min conditioning session. Rats in the Shock-  
204 unpaired group were presented with the same stimuli as the Shock-paired group during two 60

205 min sessions except that stimuli were explicitly unpaired occurring 10 min apart. Following  
206 conditioning trials, rats from both the Shock-paired and Shock-unpaired groups were re-  
207 habituated to the testing apparatus during a 30 min session where the house light was illuminated  
208 but no stimuli were presented. On the test day, rats from both groups were euthanized 90 min  
209 after a 20 min test session consisting of presentation of eight tones for 30 s each (60 s inter-  
210 stimulus interval). Freezing during tone presentation was scored manually in the Shock-paired  
211 and Shock-unpaired rats using overhead video recorded during the test session. Following  
212 euthanasia, brains were processed for CtB (1:300,000) and cFos (Millipore #PC38, 1:10,000)  
213 expression using previously published procedures (Glover et al., 2016). The number of double-  
214 labeled neurons relative to all CtB+ neurons was quantified manually across 4-5 slices spanning  
215 the rostrocaudal extent of the mPFC. Rats with off-target injection sites were excluded from  
216 analysis.

217

### 218 **In-situ hybridization**

219 Rats were unilaterally injected with green retrobeads into the RMTg and allowed at least seven  
220 days to recover before testing. The animals were assigned to either Context or Shock groups and  
221 underwent testing identical to that described above for the cFos induction experiments. Rats were  
222 anesthetized with isoflurane and decapitated 90 min after the test session. The brains were then  
223 rapidly removed and placed in ice-cold PBS for ~5 minutes before being embedded in Tissue-  
224 Tek OCT media (Sukura Finetek Inc, Torrance, CA, USA) in Peel-A-Way cryo-embedding molds  
225 (Polysciences, Inc, Warrington, PA, USA) and covered with dry ice. The frozen tissue block was  
226 then extracted from the mold, wrapped in aluminum foil, and stored at -80 °C. Subsequently, 20  
227 µm thick slices from the fresh-frozen brains were cut on a cryostat, mounted on SuperFrost Plus  
228 slides (Fisher Scientific, Hampton, NH), and stored at -80 °C until their use in in-situ hybridization  
229 experiments.

230

231 Fluorescence in-situ hybridization was performed using an Advanced Cell Diagnostics (ACD,  
232 Newark, CA) Multiplex RNAScope kit (catalog # 323100). RNA probes for dopamine D1 receptors  
233 (catalog # 317031), dopamine D2 receptors (catalog # 315641-C2), and cFos (catalog # 403591-  
234 C4) were also obtained from ACD. The RNAScope procedure was carried out according to the  
235 manufacturer's instructions (available for download at [www.acdbio.com](http://www.acdbio.com)) with the exception that  
236 the protease digestion step was omitted. We observed that omission of this step not only improved  
237 the fluorescence intensity of the mRNA transcripts (visually observed as punctate dots), but was  
238 also required for preservation of the fluorescent intensity of the green (alexa-488) retrobeads. For  
239 multiplex hybridization of D1 and D2 mRNA transcripts, the probes were labeled with Cy3 and  
240 Cy5, respectively. For multiplex hybridization of cfos and D1 mRNA transcripts, the probes were  
241 labeled with Cy3 and Cy5, respectively. Images were acquired on a Zeiss LSM880 confocal  
242 microscope across three PFC slices (5 images/slice) using a 63X oil objective. Imaging was  
243 restricted to areas of the dmPFC that exhibited retrograde bead labeling, which was mainly  
244 observed in cortical layer V. Quantification and colocalization of mRNA transcript dot within cells  
245 was performed on the captured images using Imaris Software (Bitplane, Zurich, Switzerland)  
246 following a previously published method (Centanni et al., 2019). This analysis utilized the Cell  
247 Module of Imaris, and can be summarized as follows: 1) Define and interactively threshold the  
248 cell nucleus based on DAPI staining (we used a minimum size of 5  $\mu\text{m}$  and a filter of 0.5); 2)  
249 Define and interactively threshold the cell body based upon the DAPI identified nucleus in step 1;  
250 3) Define and interactively threshold the mRNA transcript dots for each probe and for the  
251 retrobeads (we used a minimum size of 1  $\mu\text{m}$  for both the transcript dots and retrobeads); 4)  
252 Calculation of the number and other parameters of the dots that lie within each defined cell. For  
253 a cell to be considered as positive for fluorescent beads or D1/D2 mRNA transcripts, it had to  
254 contain two or more dots/beads. We observed that a number of cells exhibited a variable level of  
255 background cfos mRNA irrespective of whether they were in the Control or Shock group.  
256 Therefore, for the purpose of assessment of the effect of shock on cfos mRNA expression, we



257 used a threshold of 15 or more cfos transcript dots in order to consider a cell as being cfos+. This  
258 threshold was determined based on a comparison of the distribution of the cfos mRNA transcript  
259 dots in the control versus shocked conditions.

260

### 261 **Whole-cell patch-clamp slice electrophysiology**

262 Rats were unilaterally injected with green retrobeads into the RMTg and allowed at least three  
263 days to recover before being assigned to either Context or Shock groups and undergoing testing  
264 identical to that described above for cFos induction experiments. Twenty-four hours following the  
265 final day of testing, the intrinsic excitability of dmPFC pyramidal neurons was determined using  
266 previously published procedures (Wayman and Woodward, 2018). In brief, rats were anesthetized  
267 with urethane (3.0mg/kg, i.p.) and perfused with an ice-cold sectioning solution consisting of (in  
268 mM): 200 sucrose, 1.9 KCl, 6 MgSO<sub>4</sub>, 1.4 NaH<sub>2</sub>PO<sub>4</sub>, 25 NaHCO<sub>3</sub>, 0.5 CaCl<sub>2</sub>, 10 glucose, and 0.4  
269 ascorbic acid; pH 7.35-7.45 with 310-320 mOsm. The brains were then immediately harvested  
270 and coronal brain sections (300 µm) containing the dmPFC were sliced on a Leica VT1000S  
271 vibratome (Leica Biosystems, Buffalo Grove, IL) in oxygenated (95% O<sub>2</sub>; 5% CO<sub>2</sub>) sectioning  
272 solution and then transferred to a holding chamber containing normal artificial cerebrospinal fluid  
273 (aCSF; in mM): 125 NaCl, 2.5 KCl, 25 NaHCO<sub>3</sub>, 1.4 NaH<sub>2</sub>PO<sub>4</sub>, 1.3 MgCl<sub>2</sub>, 2 CaCl<sub>2</sub>, and 10  
274 glucose; pH 7.35-7.45 with 310-320 mOsm. Brain slices were incubated at 34 °C for 30 minutes  
275 and allowed to recover at room temperature for an additional 45 minutes.

276

277 For current clamp recordings, brain slices were transferred to the recording chamber and perfused  
278 with oxygenated and heated (~34 °C) aCSF at a flow rate of 2 mL/min. The temperature was  
279 maintained during the course of the recordings with in-line and bath heaters (Warner Instruments,  
280 Hamden, CT). Retrobead-labeled layer V neurons within the dmPFC were visually identified using  
281 a Zeiss FS2 microscope (Zeiss, Thorndale, NY). Recording pipettes were constructed from thin-  
282 walled borosilicate capillary glass tubing (I.D.=1.17mm, O.D. 1.50mm; Warner Instruments,



283 Hamden, CT), pulled with a horizontal pipette puller (P-97 Sutter Instrument Co., Novata, CA).  
284 Pipettes were filled with an internal solution containing (in mM): 120 K-gluconate, 10 HEPES, 10  
285 KCl, 2 MgCl<sub>2</sub>, 2 Na<sub>2</sub>ATP, 0.3 NaGTP, 1 EGTA and 0.2% biocytin; pH 7.35-7.45 with 285-295  
286 mOsm and had resistances ranging from 3-5 MΩ. After a stable gigaohm seal was formed, light  
287 suction was applied to break through the cell membrane and achieve whole-cell access. Neurons  
288 with an access resistance of greater than 20 mΩ were not used for analysis. Recorded events  
289 were acquired with an Axon MultiClamp 700A amplifier (Molecular Devices, Union City, CA),  
290 digitized at a sampling rate of 10 kHz (filtered at 4 kHz) with an Instrutech ITC-18 analog-digital  
291 converter (HEKA Instruments, Bellmore, NY) controlled by AxographX software (Axograph  
292 Scientific, Sydney, Australia) running on a Macintosh G4 computer (Apple, Cupertino, CA). The  
293 resting membrane potential (RMP) and capacitance of all neurons was first recorded and then  
294 the RMP was adjusted to -70 mV for electrophysiological assessments of excitability. Action  
295 potential firing was induced by a series of 500 ms current steps (0-300 pA) incremented in +20  
296 pA steps. Recordings were analyzed offline for the number of spikes in response to each current  
297 step, threshold (mV), rheobase (pA), action potential peak amplitude (mV), action potential half-  
298 width (ms) and after-hyperpolarization (AHP; mV) using AxographX software.

299  
300 The caudal portion of the brain containing the RMTg was collected at the same time that dmPFC  
301 slices were generated, immersion fixed overnight in 4% PFA, and frozen on dry ice followed by  
302 storage at -80 °C until processing. Injection sites were confirmed by visual inspection of  
303 fluorescent retrobead labeling in slices containing the RMTg made using a cryostat.

304

### 305 **Spine density analysis**

306 A dual-virus, intersectional approach was used to label RMTg-projecting dmPFC neurons. After  
307 waiting at least eight weeks for optimal viral transduction and transgene expression, rats were  
308 assigned to either Context or Shock groups and underwent behavioral testing identical to that

309 described above for cFos induction experiments. Twenty-four hours later, rats were euthanized,  
310 and brains harvested as described for cell density analysis. Brains were sliced at 100  $\mu\text{m}$  and  
311 eYFP signal was amplified (GFP, Abcam #ab290; 1:30,000) using immunofluorescence  
312 procedures optimized for thick slices (Kupferschmidt et al., 2015). Primary apical dendrites  
313 measuring 55  $\mu\text{m}$  in length approximately 200-300  $\mu\text{m}$  from the soma of eYFP+ neurons in the  
314 dmPFC were imaged using a 63.5X oil immersion objective on a Zeiss LSM880 confocal  
315 microscope. Images were analyzed in Imaris using previously published procedures (McGuier et  
316 al., 2015). Dendrite diameter, dendrite volume, and total spine density were analyzed in addition  
317 to analyses conducted by spine classification. Measures included density, length, diameter, and  
318 volume by spine class as well as diameter and volume of spine terminal point and spine neck  
319 volume, length, and diameter. Measures were collected in 3-5 dendrites per rat and averaged  
320 across dendrites to arrive at a single value for each rat.

321

## 322 **Statistical analysis**

323 Student's t-test and analysis of variance (ANOVA) were performed to analyze all functional data  
324 as indicated below in the Results section. Greenhouse-Geisser correction was performed on data  
325 that lacked sphericity. All analyses were performed using GraphPad Prism 8.0 and are presented  
326 as mean  $\pm$  SEM. Effects were considered statistically significant at  $p \leq 0.05$ .

327

## 328 **RESULTS**

### 329 **Cortical input to the RMTg is dense, glutamatergic, and exhibits extensive collaterals**

330 While initial reports indicated the presence of cortical efferents to the RMTg, the magnitude of this  
331 input and subregional distribution was unclear. To investigate this, RMTg-projecting cell bodies  
332 were quantified in rat brains injected with the retrograde tracer CtB. Visual inspection of slices  
333 double stained for CtB and the neuronal marker, NeuN, revealed the presence of dense input  
334 spanning the medial wall of the PFC and the entire OFC (**Figure 1A**). In line with previous reports,

335 relatively low but consistent labeling was also observed in the anterior insular cortex (AIC)  
336 (Kaufling et al., 2009; Zhou et al., 2009b). In agreement with the well-understood layer specificity  
337 of cortico-subcortical projections in the rodent mPFC, the majority of CtB<sup>+</sup> cell bodies originated  
338 in layer V (**Figure 1B**). Consistent cell body labeling was also apparent in the deepest portion of  
339 layer VI, albeit to a much smaller degree than was observed in layer V. Quantification of layer V  
340 CtB<sup>+</sup> neurons relative to NeuN<sup>+</sup> neurons in the mPFC revealed relatively uniform densities of  
341 RMTg-projecting neurons across the rostrocaudal extent of ACC ( $3.96 \pm 0.28\%$ ), PL ( $8.59 \pm$   
342  $0.45\%$ ), and IL ( $7.95 \pm 0.77\%$ ) subregions (**Figure 1C**). In contrast, the density of RMTg-projecting  
343 dorsopeduncular (DP) mPFC neurons increased substantially at more caudal levels relative to  
344 rostral DP mPFC ( $13.02 \pm 2.91\%$ ).

345  
346 The density of CtB-labeled neurons was relatively similar across subregions of the OFC at rostral  
347 levels but began to diverge slightly more caudally (**Figure 1E**). On average, density was greatest  
348 and somewhat variable in the medial orbital (MO) cortex ( $8.01 \pm 1.32\%$ ). By contrast, CtB labeling  
349 was lower and less variable in the dorsolateral orbital (DLO) cortex ( $5.48 \pm 0.62\%$ ). The density  
350 of RMTg-projecting ventro-orbital (VO) and latero-orbital (LO) cortical projections varied  
351 substantially from rostral to more caudal levels within the brain. In the VO, density was greatest  
352 at the rostral-most point of the OFC ( $9.18 \pm 1.43\%$ ) after which CtB labeling diminished ( $4.35 \pm$   
353  $0.98\%$ ) before increasing in density at its most caudal point ( $7.03 \pm 1.87\%$ ). By contrast, RMTg-  
354 projecting neurons arising from the LO cortex are most dense at the rostral tip of the region ( $7.45$   
355  $\pm 1.43\%$ ) and become progressively less dense as one moves caudally with very little CtB<sup>+</sup> cell  
356 bodies in the most caudal region ( $1.05 \pm 0.73\%$ ).

357  
358 Although substantially less dense than projections arising from the mPFC and OFC, CtB<sup>+</sup> cell  
359 bodies were consistently observed in subregions of the AIC (**Figure 1F**). Density was greatest in  
360 the agranular AIC with approximately 4.5% of layer V neurons in dorsal (AID) and ventral (AIV)

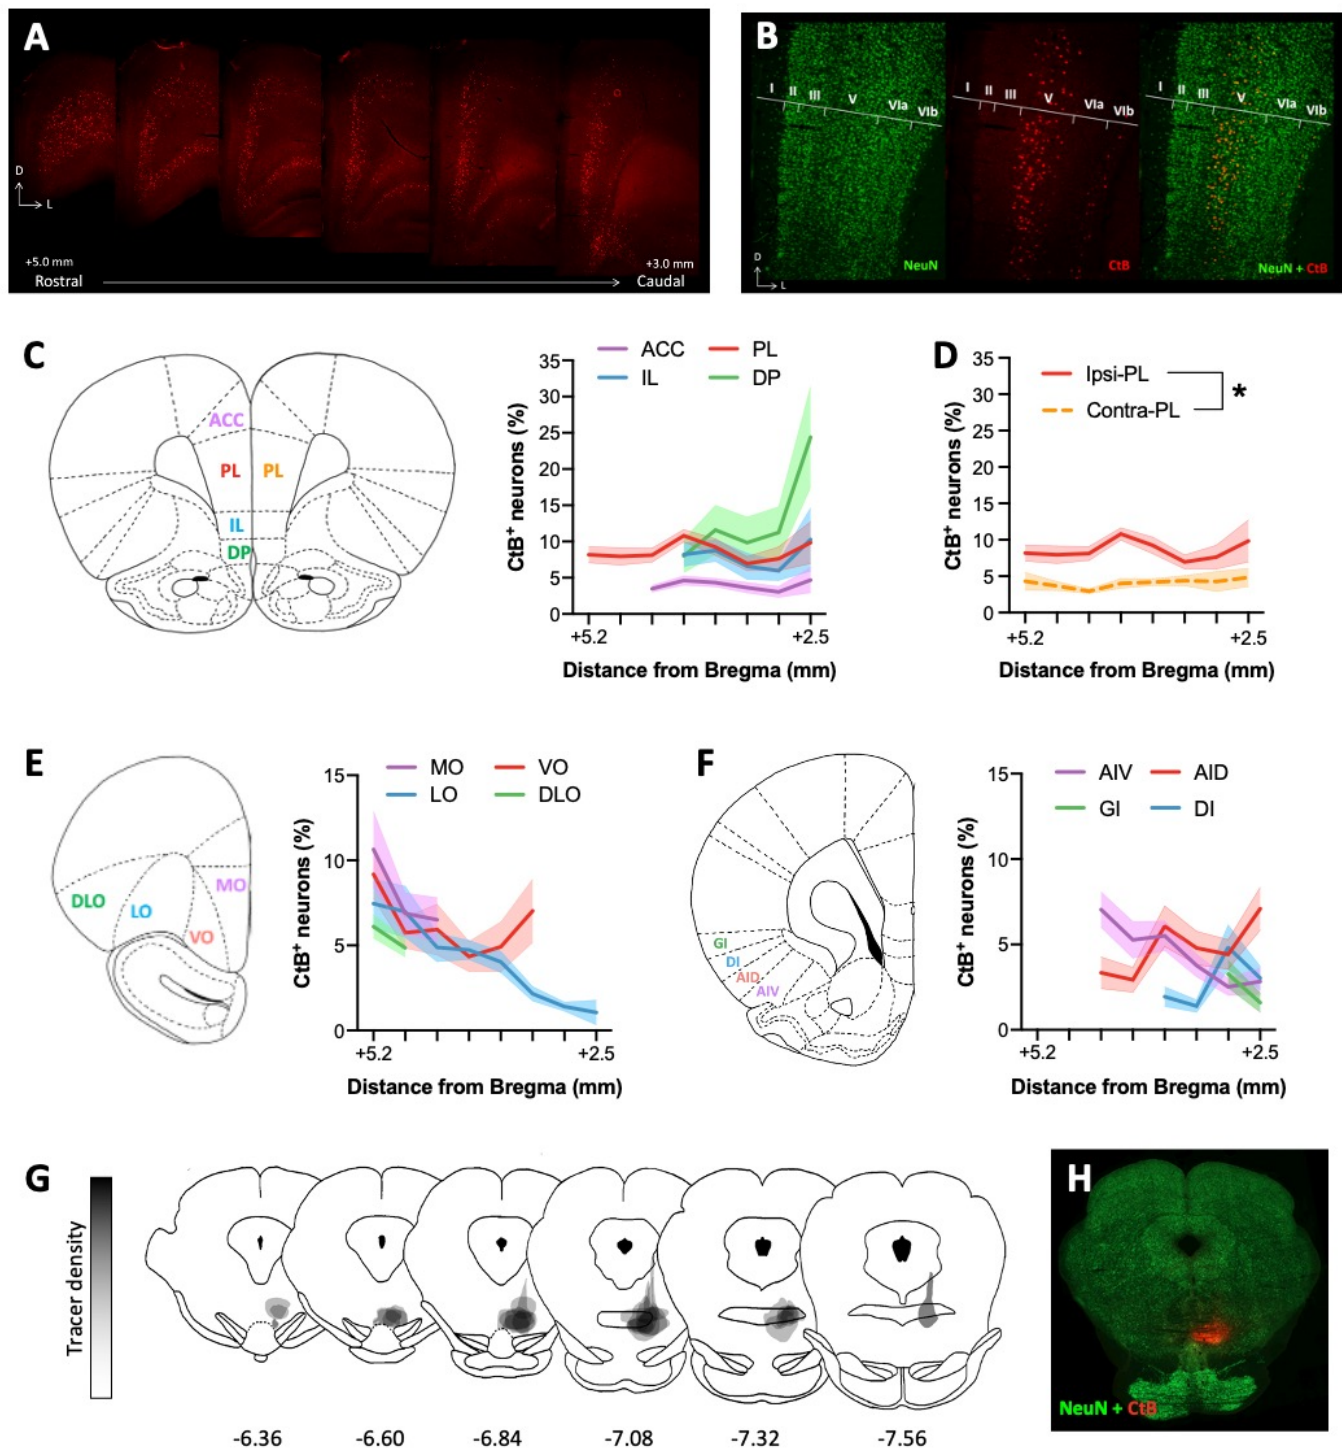

**Figure 1. Anatomical distribution of cortical inputs to the RMTg.** (A) Representative images demonstrating dense ipsilateral cortical labeling in brain areas injected with CtB into the RMTg. (B) Representative high magnification image showing that inputs to the RMTg arise primarily from layer V of the mPFC. (C) The percent of CtB<sup>+</sup> neurons relative to all layer V NeuN<sup>+</sup> neurons is relatively consistent across ACC, PL, and IL subregions of the mPFC whereas the density of RMTg-projecting DP mPFC neurons increases substantially at more caudal levels. (D) Contralateral cortical afferents are substantially less dense than ipsilateral inputs as exemplified by a comparison of RMTg-projecting PL mPFC neurons in both hemispheres. (E) The density of layer V OFC neurons projecting to the RMTg is similar to that observed in the mPFC with LO inputs diminishing at more caudal levels. (F) CtB labeling is consistently observed in the AIC, albeit to a lesser degree than that observed in mPFC and OFC. (G) Map of tracer injection sites for all animals included in quantification. (H) Representative injection site. Abbreviations: ACC = anterior cingulate cortex; AID = agranular insular cortex, dorsal; AIV = agranular insular cortex, ventral; DI = dysgranular insular cortex; DLO = dorsolateral orbitofrontal cortex; DP = dorsopeduncular cortex; GI = granular insular cortex; IL = infralimbic cortex; LO = lateral orbitofrontal cortex; MO = medial orbitofrontal cortex; PL = prelimbic cortex; VO = ventral orbitofrontal cortex.

361 subregions projecting to the RMTg (AID:  $4.77 \pm 0.65\%$ ; AIV:  $4.49 \pm 0.72\%$ ). By contrast, CtB  
362 labeling was approximately half that of agranular AIC subregions in the dysgranular (DI;  $2.8 \pm$   
363  $0.76\%$ ) and granular (GI;  $2.43 \pm 0.84\%$ ) cortices.

364  
365 As is often the case, CtB labeling was most dense in the hemisphere ipsilateral to the injection  
366 site with substantially less labeling apparent in the contralateral cortex. To measure this directly,  
367 we quantified the density of layer V RMTg-projecting neurons in the contralateral PL mPFC and  
368 found that contralateral cell density was approximately half that of the ipsilateral projection ( $4.07$   
369  $\pm 0.20\%$ ) (**Figure 1D**). A two-way RM ANOVA comparing cell density between ipsilateral and  
370 contralateral hemispheres across the rostrocaudal extent of the PL mPFC confirmed that  
371 significantly fewer RMTg-projecting cells arise in the contralateral compared to ipsilateral  
372 hemisphere regardless of rostrocaudal level [main effect of hemisphere:  $F(1,16)=45.09$ ,  
373  $p<0.0001$ ).

374  
375 Layer V cortical efferents are typically excitatory in nature, however, recent work has revealed the  
376 presence of long-range GABAergic projection neurons arising from various cortical regions  
377 including the mPFC (Lee et al., 2014; Basu et al., 2016; Rock et al., 2018). To determine the  
378 neurochemical composition of RMTg-projecting cortical neurons, CtB-expressing slices adjacent  
379 to those used in the cell density analysis were labeled with CaMKII $\alpha$  or GAD67. As shown in  
380 **Figure 2**, CtB-labeled neurons were predominantly CaMKII $\alpha$ +. In contrast, virtually no overlap in  
381 expression was observed between CtB and the GABAergic marker, GAD67. These data indicate  
382 that RMTg-projecting cortical neurons are excitatory projection neurons.

383  
384 A number of cortico-subcortical projections purported to be involved in reward and aversion arise  
385 in layer V of the dmPFC. To examine whether RMTg-projecting dmPFC neurons may also overlap  
386 with populations of other subcortically projecting layer V neurons, neurons in this projection from



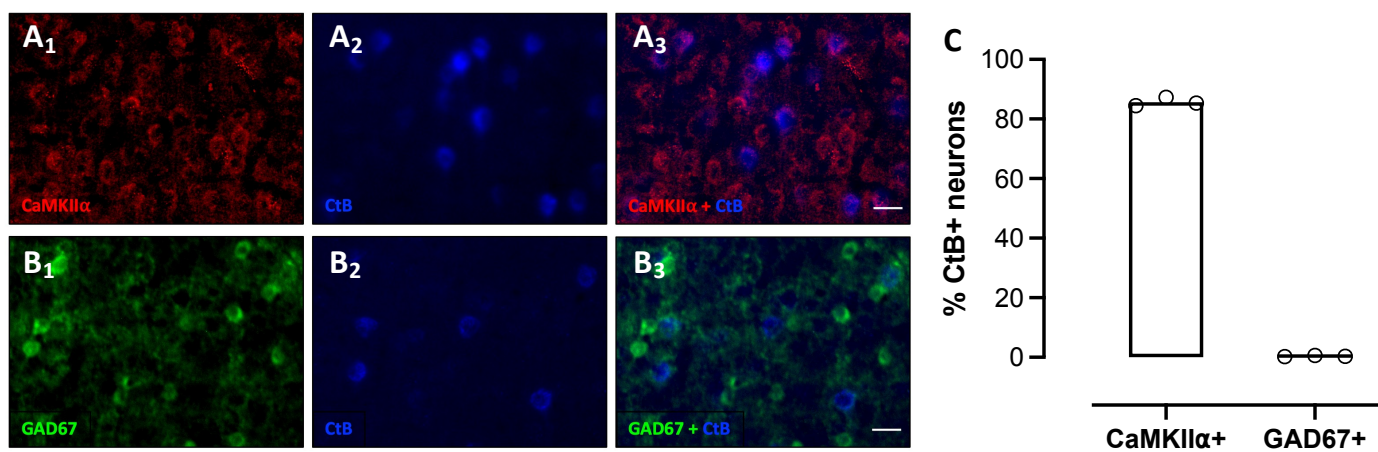

**Figure 2. RMTg-projecting dmPFC neurons express CaMKII $\alpha$ .** Representative mPFC images co-labeled for (A<sub>1-3</sub>) the glutamatergic marker CaMKII $\alpha$  (red) and CtB (blue) and the (B<sub>1-3</sub>) GABAergic marker GAD67 (green) and CtB (blue) from rat injected with CtB into the RMTg. (C) Quantification of co-labeling reveals that RMTg-projecting neurons are CaMKII $\alpha$ <sup>+</sup>. Scale bar = 25  $\mu$ m.

387 four rats were selectively filled with green fluorescent protein using an intersectional, dual-virus  
388 approach (**Figure 3A**). Labeling was absent in one rat that was, therefore, excluded from analysis.  
389 In the remaining three rats, labeling was targeted to the dmPFC, was restricted to the injected  
390 hemisphere, and was not apparent in cell bodies outside of the dmPFC indicating successful  
391 isolation of the dmPFC-RMTg circuit (**Figure 3B**). Dense punctate labeling, indicative of synaptic  
392 terminals, was evident in a number of subcortical regions. Quantification of staining density  
393 relative to background (**Figure 3C-D**) revealed the greatest density of collaterals in the  
394 dorsomedial striatum ( $11.31 \pm 3.11\%$ ), whereas the dorsolateral striatum was virtually devoid of  
395 labeling ( $0.07 \pm 0.01\%$ ). Ventrally, RMTg-projecting dmPFC neurons collateralized to a moderate  
396 degree in the nucleus accumbens core ( $6.03 \pm 1.31\%$ ) as well as the shell ( $0.34 \pm 0.19\%$ ), albeit  
397 very weakly. Substantial collateralization was also observed in the ventral pallidum ( $11.05 \pm$   
398  $3.98\%$ ), hypothalamus ( $8.48 \pm 0.98\%$ ), periaqueductal gray ( $6.54 \pm 1.50\%$ ), and lateral preoptic  
399 nucleus ( $6.20 \pm 0.74\%$ ). Terminal labeling was much less dense in the lateral habenula ( $5.15 \pm$   
400  $1.55\%$ ) and ventral tegmental area ( $2.58 \pm 1.07\%$ ) – two regions heavily interconnected with both  
401 the dmPFC and the RMTg. By comparison, terminal labeling in the RMTg itself was  $3.58 \pm 0.17\%$ .  
402 The amygdala also receives significant input from layer V dmPFC neurons and, like the RMTg, is  
403 well-known for its role in avoidance and aversive signaling. Despite this, only very weak terminal  
404 labeling was apparent in this region ( $0.94 \pm 0.08\%$ ). The dorsal hippocampus (Hipp) and  
405 secondary somatosensory cortex (S2) were used as negative controls as it is well-known that  
406 these regions do not receive any input from the dmPFC (Hipp:  $0.02 \pm 0.01\%$ ; S2:  $0.01 \pm 0.00\%$ ).

407

### 408 **Selective stimulation of RMTg-projecting dmPFC neurons drives avoidance behavior**

409 To begin to investigate whether dmPFC inputs to the RMTg play a significant role in aversive  
410 signaling, in-vivo optogenetics was used to measure real-time place preference in response to  
411 activation of this neural circuit. Testing on day 1 revealed that stimulation of dmPFC terminals in  
412 the RMTg resulted in significant avoidance of the light-paired compartment relative to chance

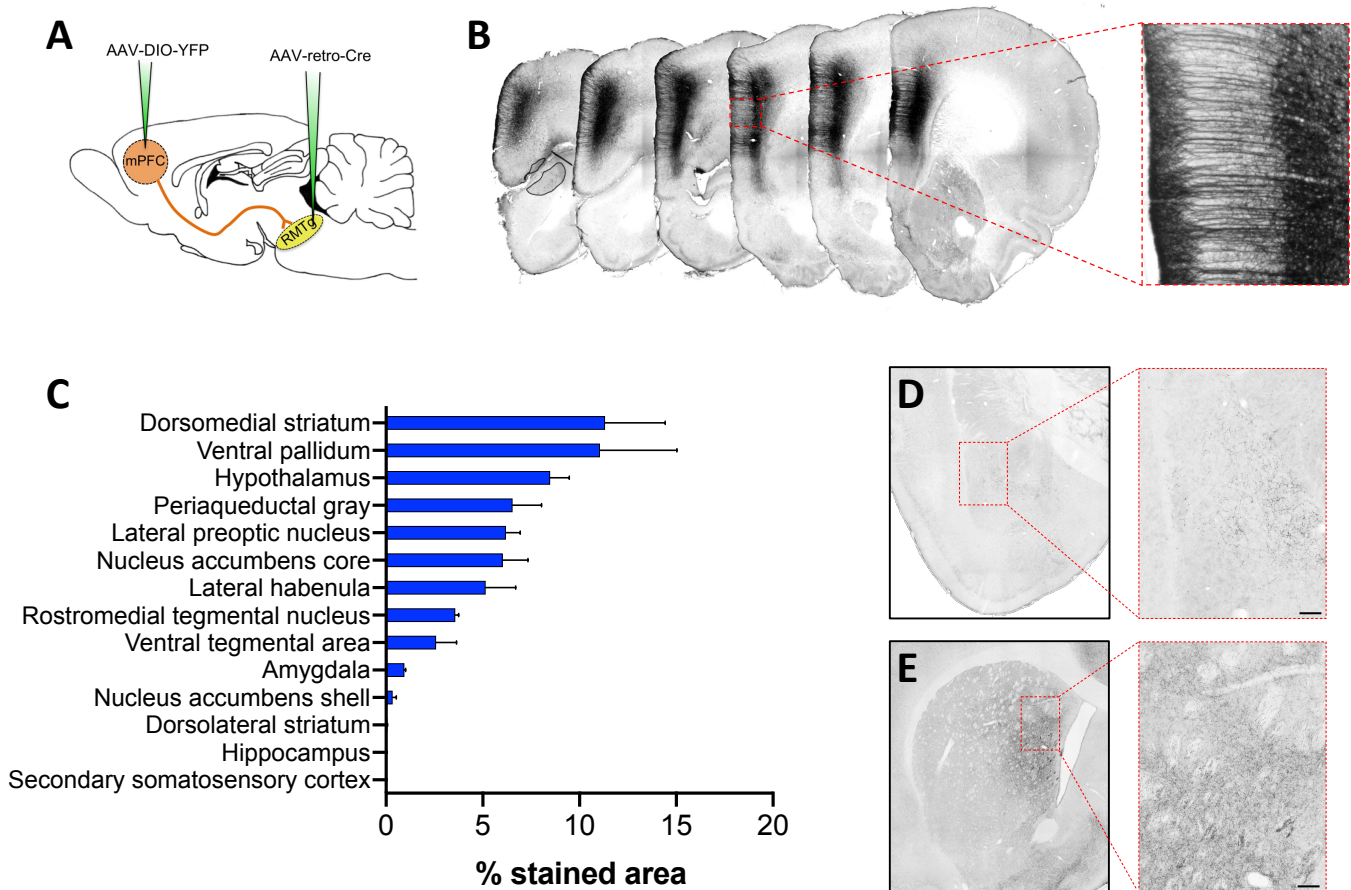

**Figure 3. RMTg-projecting dmPFC neurons collateralize throughout the brain.** (A) An intersectional dual-virus approach was used to fill RMTg-projecting dmPFC neurons with yellow fluorescent protein (YFP). (B) Representative images showing RMTg-projecting dmPFC neurons filled with YFP following amplification using standard immunohistochemistry. (C) Quantification of the average percent-stained area within ROIs placed within the respective brain regions. (D) Representative YFP staining in the amygdala shows relatively sparse collateralization of RMTg-projecting dmPFC neurons in the basolateral nucleus. (E) Representative YFP staining in the striatum shows dense collateralization in the dorsomedial but not dorsolateral striatum. Scale bar = 100  $\mu$ m.



413 **(Figure 4B)**. This effect was replicated during testing on day 2 when the light-paired compartment  
414 was reversed [One-way ANOVA test 1 x test 2 x chance:  $F(1.95,7.75)=22.74$ ;  $p=0.0006$ ]. The  
415 magnitude of this avoidance was similar to that observed during stimulation of LHb terminals in  
416 the RMTg **(Figure 4C)**, which was also significantly lower than chance [One-way ANOVA test 1  
417 x test 2 x chance:  $F(1.59,7.95)=9.60$ ;  $p=0.0095$ ]. In contrast, stimulation of dmPFC terminals in  
418 the neighboring VTA resulted in neither preference nor avoidance of the light-paired compartment  
419 **(Figure 4D)** on either day 1 or day 2 [One-way ANOVA test 1 x test 2 x chance:  $F(1.04,$   
420  $3.11)=0.095$ ;  $p=0.7866$ ]. Direct comparison of the effect of each circuit manipulation on real-time  
421 place preference revealed that stimulation of either dmPFC or LHb inputs to the RMTg drove  
422 avoidance behavior that was significantly different from stimulation of dmPFC inputs to the VTA  
423 **(Figure 4E)** [One-way ANOVA:  $F(2,12)=7.30$ ,  $p=0.0084$ ]. Altogether, these data indicate that,  
424 similar to the LHb-RMTg projection, activation of dmPFC inputs to the RMTg provides an aversive  
425 signal to promote avoidance behavior.

426

#### 427 **RMTg-projecting mPFC neurons are activated following exposure to aversive stimuli**

428 While optogenetic stimulation of dmPFC-RMTg neurons demonstrates that activation of this  
429 pathway can facilitate avoidance, we are unable to conclude from these data that neurons in this  
430 circuit are indeed active during avoidance and/or during similar behavioral responses to aversive  
431 stimuli. To explore this possibility, rats were euthanized 90 min following exposure to either neutral  
432 or aversive stimuli following injection of CtB into the RMTg **(Figure 5A)**. Two groups of rats were  
433 exposed to a series of tones and foot shocks. In one group, tones were predictive of shock as in  
434 a standard fear conditioning paradigm. In contrast, in the other group, rats were exposed to the  
435 same number of tones and shocks but in an unpaired manner such that tones were not predictive  
436 of shock. As expected, rats in the Shock-paired tone group exhibited significantly greater freezing  
437 in response to tone presentation on test day than rats in the Shock-unpaired group (t-test;  
438  $p=0.0005$ ; **Figure 5B**). Behavioral data was not collected on the two remaining groups of rats

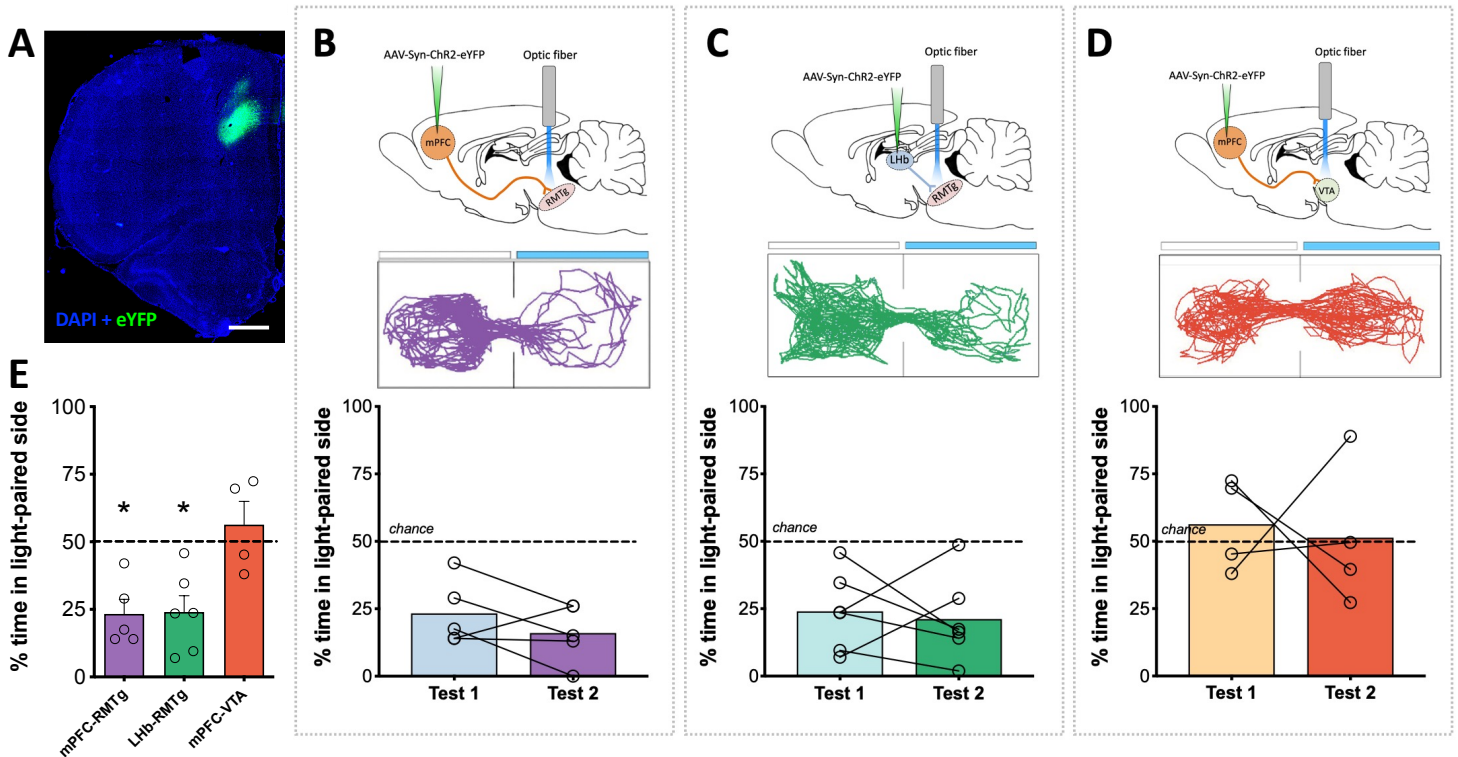

**Figure 4. Optogenetic stimulation of RMTg-projecting dmPFC terminals drives avoidance. (A)** Representative ChR2 expression in dmPFC. **(B)** Rats spend significantly less time relative to chance in the light-paired side of a two-compartment chamber during initial testing (test 1) and when the light-paired compartment is reversed (test 2) when light delivery results in stimulation of dmPFC terminals in the RMTg. **(C)** A similar degree of avoidance of the light-paired chamber is observed upon stimulation of lateral habenula inputs to the RMTg. **(D)** Unlike stimulation of dmPFC terminals in the RMTg, stimulation of dmPFC terminals in the VTA fails to produce either preference for or avoidance of the light-paired compartment. **(E)** Direct comparison of circuit manipulations reveals significant avoidance when stimulating inputs to the RMTg relative to the VTA. Light-paired side indicated by blue bar in representative maps above each dataset. \* $p \leq 0.01$ , scale bar = 1000  $\mu\text{m}$ .

439 exposed to either the neutral testing context or a series of foot shocks (without tone presentation).  
440 A one-way ANOVA comparing the magnitude of cFos expression in CtB<sup>+</sup> neurons in the mPFC  
441 revealed a significant effect of treatment condition on cFos induction (**Figure 5C-D**)  
442 [F(3,32)=11.00, p<0.0001]. Post-hoc comparisons revealed that cFos expression was  
443 significantly greater in RMTg-projecting mPFC neurons of rats that were exposed to a series of  
444 either foot shocks or tones predictive of shocks relative to rats exposed to the neutral testing  
445 context (shock: p<0.0001; shock-paired tone: p=0.006). The magnitude of cFos expression in  
446 CtB<sup>+</sup> mPFC neurons in shock-exposed rats was also significantly greater than was observed in  
447 rats exposed to tones that were explicitly unpaired with shocks (p=0.004). In combination with  
448 results from the real-time place preference testing, these data suggest that RMTg-projecting  
449 mPFC neurons are activated in response to learned and unlearned aversive stimuli and may play  
450 a role in regulating the behavioral response to such stimuli.

451  
452 **Functional & structural changes in RMTg-projecting dmPFC neurons following exposure**  
453 **to aversive stimuli**

454 Given the above evidence that dmPFC inputs to the RMTg are activated in response to aversive  
455 stimuli, we next investigated the potential impact that exposure to such stimuli has on plasticity in  
456 this neural circuit (**Figure 6A**). A two-way repeated measures ANOVA of spiking measured during  
457 whole-cell patch-clamp recordings from RMTg-projecting dmPFC neurons revealed a significant  
458 interaction between current step and stimulus exposure [F(15,315)=22.08, p<0.0001] such that  
459 spike frequency was significantly reduced as current injection increased beyond 200 pA in rats  
460 exposed to the same foot shock procedure that induced significant cFos expression relative to  
461 Context controls (Sidak correction; all p values ≤ 0.03; **Figures 6B-C**). This effect was  
462 accompanied by a significantly higher rheobase (t-test; p<0.0001), significantly lower membrane  
463 resistance (t-test; p<0.0001), and higher membrane capacitance (t-test; p<0.0434) in shock-  
464 exposed rats compared to context controls. No significant difference in action potential threshold

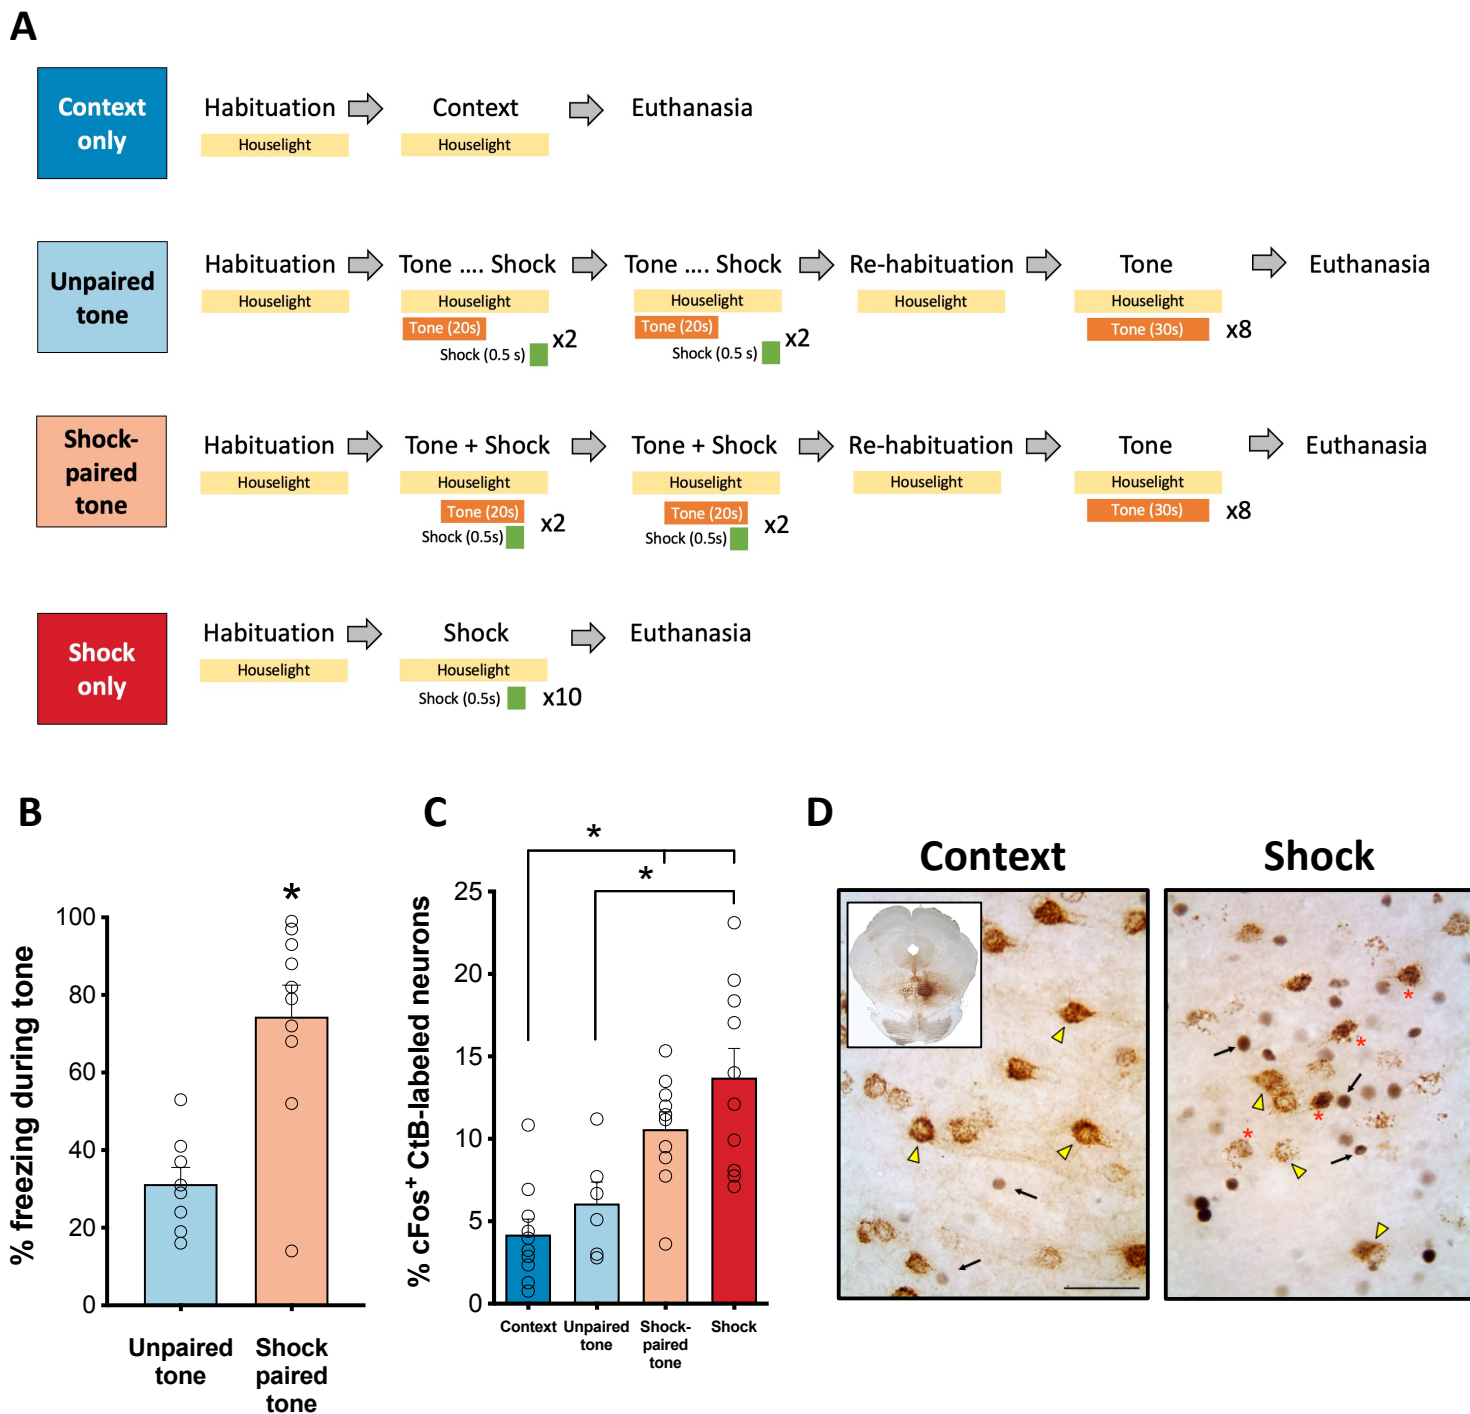

**Figure 5. cFos induction in RMTg-projecting dmPFC neurons following exposure to aversive stimuli. (A)** Experimental procedures. **(B)** Rats that had tone paired with foot shock delivery displayed significantly more freezing behavior in response to tone presentation than rats that were exposed to the same number of tone-shock presentations but in an unpaired manner. **(C)** Significantly greater cFos expression was observed in RMTg-projecting dmPFC neurons (CtB+) following exposure to either a series of foot shocks or a tone predictive of foot shock relative to a neutral tone or the testing context alone. **(D)** Representative images of CtB and cFos labeling in the dmPFC of a context-exposed rat and a rat exposed to foot shock. CtB<sup>+</sup>/cFos<sup>-</sup> neurons are indicated with a yellow arrowhead; CtB<sup>-</sup>/cFos<sup>+</sup> neurons are indicated with a black arrow; CtB<sup>+</sup>/cFos<sup>+</sup> neurons are indicated by a red asterisk. Scale bar = 200  $\mu$ m.

465 was observed between groups (t-test;  $p=0.1555$ ; **Figures 6D-G**). Action potential duration and  
466 amplitude were significantly different between groups with Shock-exposed rats exhibiting action  
467 potentials of greater amplitude (t-test;  $p=0.0232$ ) and shorter duration (t-test;  $p=0.0002$ ) than  
468 Context-exposed rats (**Figures 6H-I**). No significant difference in action potential after-  
469 hyperpolarization was observed between groups (t-test;  $p=0.2625$ ; **Figure 6J**). Overall, these  
470 data are indicative of decreased intrinsic excitability in RMTg-projecting dmPFC neurons following  
471 exposure to an aversive stimulus.

472  
473 To examine the impact of exposure to aversive stimuli on structural plasticity, we next quantified  
474 dendritic spine density and morphology in RMTg-projecting dmPFC neurons in rats exposed to  
475 either foot shock or a neutral context (**Figures 7A-B**). T-tests were used to analyze differences in  
476 dendrite diameter and volume as well as dendritic spine density collapsed across spine class.  
477 Two-way ANOVAs were used to analyze spine density and morphology by spine class between  
478 groups. No significant differences in dendrite diameter, volume or overall spine density were  
479 observed between Context- and Shock-exposed rats ( $p$  values  $> 0.50$ ; **Table S1**). Analysis of  
480 spine density revealed a main effect of spine class [ $F(3,40)=53.37$ ,  $p<0.0001$ ] but no main effect  
481 of stimulus exposure [ $F(1,40)=0.075$ ,  $p=0.7856$ ] or interaction between the two factors  
482 [ $F(3,40)=1.34$ ,  $p=0.2756$ ]. Tukey corrected post-hoc comparisons of the main effect of spine class  
483 revealed that both Context- and Shock-exposed rats had a significantly greater density of  
484 mushroom-shaped spines relative to all other spine classes (all  $p$  values  $< 0.0001$ ; **Figure 7C**).  
485 Of the eight other measures of spine morphology analyzed, no significant between-group  
486 differences were observed in dendritic spine length, diameter, or volume. Similarly, no significant  
487 between-group differences in spine terminal point diameter or volume were observed. Spine neck  
488 volume was not significantly different between groups either (**Table S1**). In contrast, a significant  
489 main effect of stimulus exposure [ $F(1,33)=9.85$ ,  $p=0.0036$ ] was observed for spine neck diameter  
490 in the absence of a significant interaction between stimulus exposure and spine class

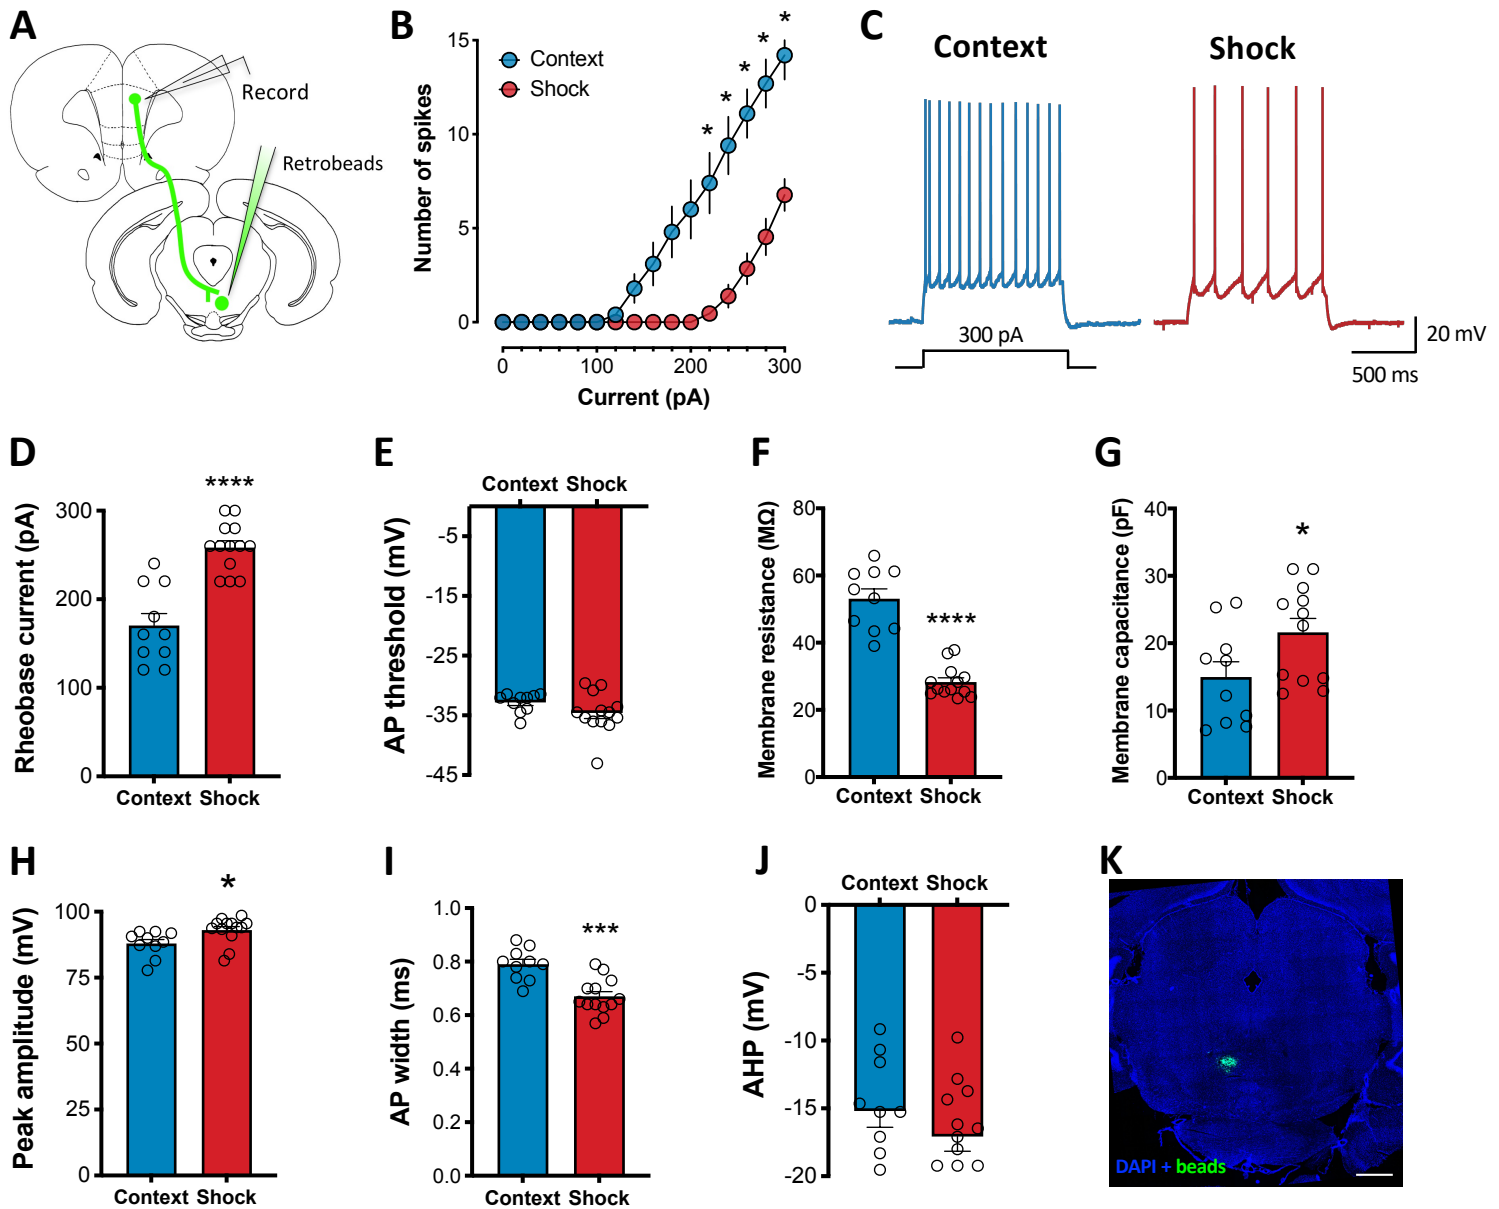

**Figure 6. Decreased excitability in RMTg-projecting dmPFC neurons following exposure to aversive stimuli.**

**(A)** Experimental preparation. **(B)** Significantly fewer spikes were observed in shock-exposed rats relative to controls in current clamp recordings of retrobead-labeled dmPFC neurons. **(C)** Representative traces from a control and shock-exposed rat. Decreased spiking was associated with a significant increase in **(D)** rheobase, **(G)** membrane capacitance, and **(H)** peak action potential amplitude as well as a significant decrease in **(F)** membrane resistance and **(I)** action potential half-width. No significant difference was observed in **(E)** action potential threshold or **(J)** after-hyperpolarization. **(K)** Representative retrobead injection site in the RMTg. \* $p \leq 0.05$ , scale bar = 1000  $\mu$ m.



491 [F(3,33)=1.69, p=0.1884] indicative of greater spine neck diameter in Shock-exposed rats across  
492 all spine classes compared to Context-exposed rats (**Figure 7D**). A significant main effect of spine  
493 class was also uncovered with post-hoc analyses revealing that for both context- and shock-  
494 exposed rats, long, thin spines had significantly greater spine neck diameter than other spine  
495 classes (all p values  $\leq 0.002$ ). Differences in spine neck length were also observed between  
496 Context- and Shock-exposed rats (**Figure 7E**) with significant main effects of both spine class  
497 [F(3,29)=180.60, p<0.0001] and stimulus exposure [F(1,290)=4.19, p=0.0498]. While a significant  
498 interaction between the two factors was also uncovered [F(3,29)=3.18, p=0.0388], Sidak's  
499 multiple comparisons failed to identify significant differences in spine neck length within any given  
500 spine class between Context- and Shock-exposed rats (all p values > 0.05).

501

#### 502 **RMTg-projecting dmPFC neurons express both D1 and D2 dopamine receptors**

503 D1 and D2 dopamine receptors play important roles in prefrontal regulation of behavioral flexibility  
504 and decision-making (Floresco, 2013). A number of studies suggest that, similar to their  
505 distribution in the striatum, D1- and D2-expressing neurons in the mPFC are anatomically and  
506 functionally distinct cell populations (e.g., Gaspar et al., 1995). RNAScope for D1 and D2 receptor  
507 mRNA was used in combination with fluorescent retrograde tracing to investigate whether RMTg-  
508 projecting dmPFC neurons exhibit a distinct dopamine receptor expression profile and whether  
509 dopamine receptor gene expression was altered in these neurons following exposure to an  
510 aversive stimulus. As shown in **Figures 8A-F**, fluorescent retrobead-labeled cells (bead+)   
511 comprised approximately 62% of the total population of cells analyzed. A two-way ANOVA  
512 indicated that there was no significant difference in the number of either total or bead+ cells  
513 between control and shock-exposed rats [Main effect of treatment: F(1,12)=0.002, p=0.0966;  
514 treatment x cell-type: F(1,12)=0.10, p=0.759]. In addition, no significant between-group  
515 differences were observed using a two-way ANOVA to compare the percent of bead+ cells that  
516 were also positive for either D1 or D2 mRNA in control and shock-exposed rats [F(3,24)=0.28,

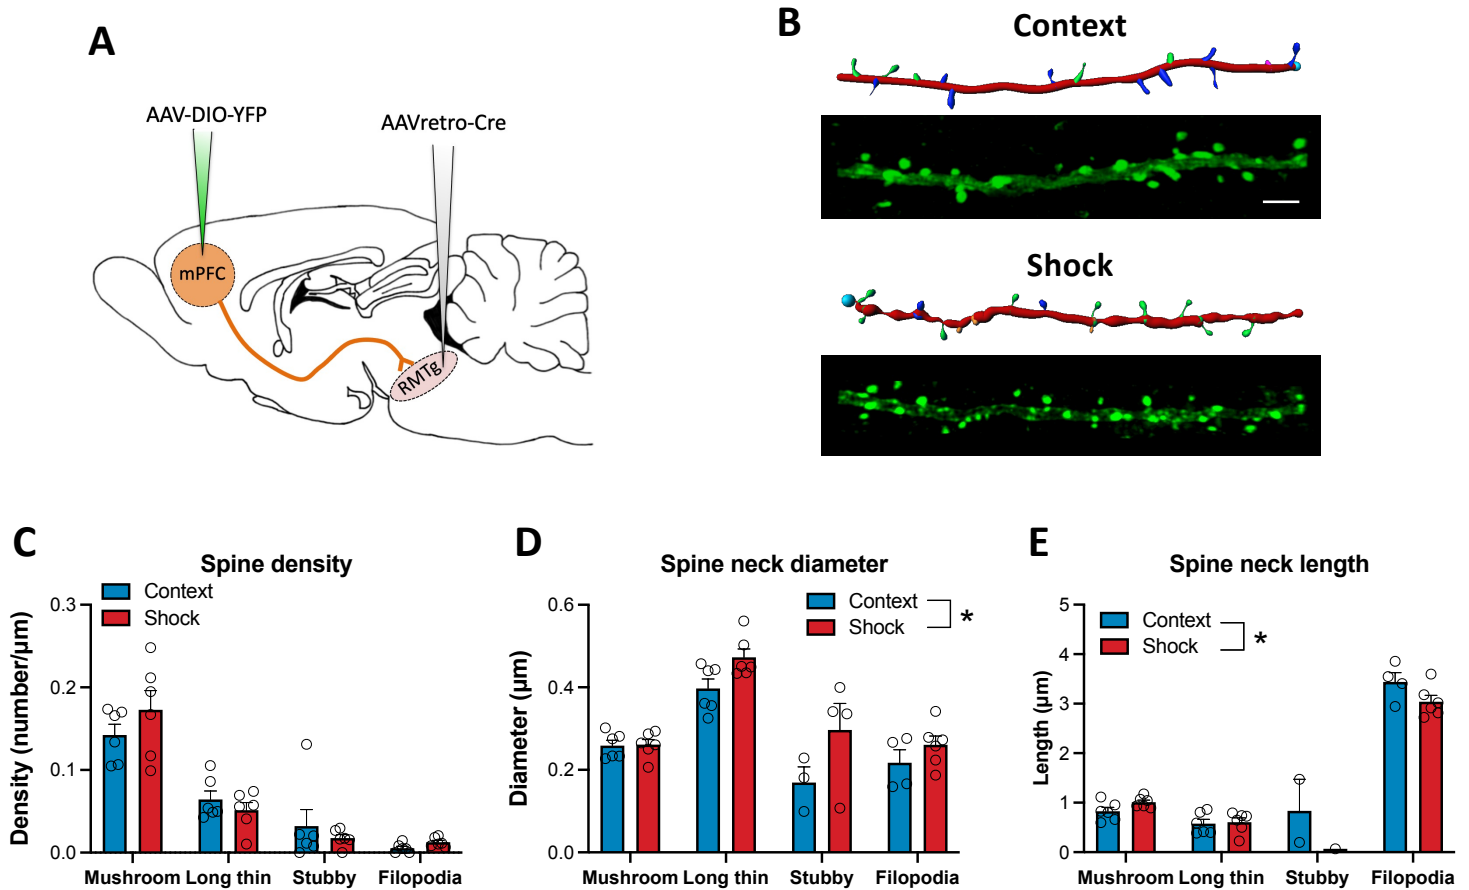

**Figure 7. Exposure to aversive stimuli increases spine neck diameter in RMTg-projecting dmPFC neurons.** (A) An intersectional dual-virus approach was used to fill RMTg-projecting dmPFC neurons with yellow fluorescent protein (YFP). (B) Representative YFP-filled primary apical dendrites in the dmPFC and accompanying IMARIS renderings for context- and shock-exposed rats. (C) Spine density did not differ between groups regardless of subclass. However, shock-exposed rats exhibited significantly greater spine neck diameter (D) and shorter spine length (E) across all subtypes (main effect of shock) relative to rats exposed to the neutral testing context. \* $p \leq 0.05$ ; scale bar = 5  $\mu\text{m}$ .



517 p=0.8411] (**Figure 8G**). Collapsing across groups, classification of bead<sup>+</sup> cells by dopamine  
518 receptor mRNA expression revealed that RMTg-projecting dmPFC neurons are predominantly  
519 D1 receptor-expressing (87%) with a substantial proportion also expressing D2 receptors (59%)  
520 (**Figure 8H**). Only a small proportion of bead<sup>+</sup> neurons expressed D2 mRNA in the absence of  
521 D1 mRNA (5%) and approximately 8% lacked both mRNA for either receptor. To examine whether  
522 exposure to an aversive stimulus altered the magnitude of dopamine receptor gene expression in  
523 RMTg-projecting dmPFC neurons, two-way ANOVAs were used to compare the average number  
524 of RNAScope dots present per cell across dopamine receptor-expressing cell types. As shown in  
525 **Figures 8I-J**, foot shock exposure had no significant effect on either D1 (Treatment:  $F(1,18)=2.09$ ,  
526  $p=0.1651$ ; treatment x cell-type:  $F(2,18)=0.21$ ,  $p=0.8138$ ) or D2 (Treatment:  $F(1,18)=1.38$ ,  
527  $p=0.2550$ ; treatment x cell-type:  $F(2,18)=0.30$ ,  $p=0.7445$ ) mRNA expression.

528  
529 To further explore whether cFos induction observed following exposure to aversive stimuli is  
530 specific to a unique dopamine receptor-expressing population of dmPFC-RMTg neurons, we next  
531 measured induction of cfos mRNA colocalized with D1 receptor mRNA (the predominantly  
532 expressed dopamine receptor in these neurons). As expected, cfos expression was significantly  
533 enhanced in Shock-exposed rats relative to rats exposed to a neutral context (**Figure 9A**), and  
534 this was true regardless of retrobead labeling [two-way ANOVA main effect of treatment:  
535  $F(1,12)=4.72$ ,  $p=0.0505$ ]. When comparing cfos expression in D1<sup>+</sup> and D1<sup>-</sup> RMTg-projecting  
536 dmPFC neurons, a two-way ANOVA revealed a main effect of treatment with Shock-exposed rats  
537 exhibiting a greater proportion of cfos in both cell types relative to Context controls (**Figure 9B**).  
538 However, this effect only trended toward statistical significance for a main effect of shock  
539 exposure [ $F(1,12)=4.05$ ,  $p=0.0673$ ]. Similarly, the magnitude of cFos mRNA expression, as  
540 measured by average number of cFos dots per cell, was significantly greater in RMTg-projecting  
541 dmPFC neurons of Shock-exposed rats compared to controls regardless of D1 receptor  
542 expression profile (**Figure 9C**; main effect:  $F(1,12)=4.50$ ,  $p=0.0555$ ). Altogether, these data

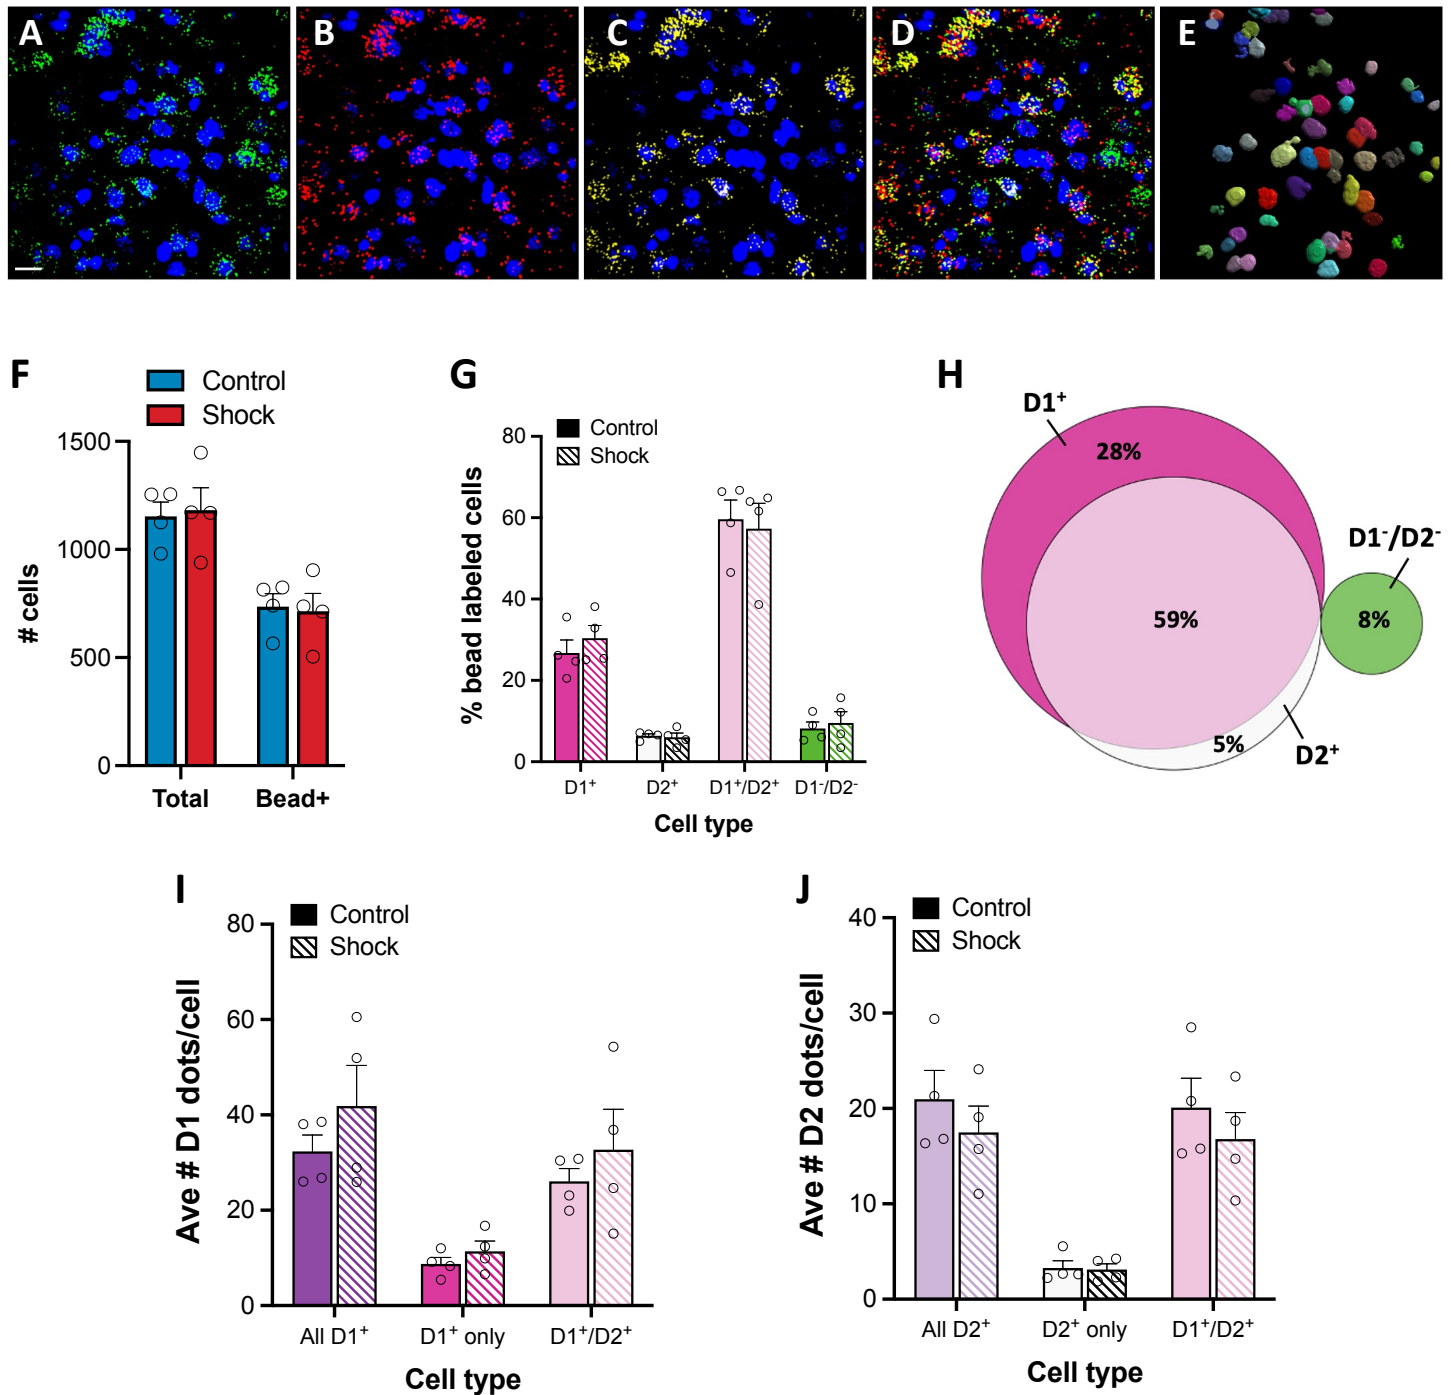

**Figure 8. D1 & D2 receptor gene expression in RMTg-projecting dmPFC neurons.** (A-E) Representative labeling in dmPFC neurons shows dense retrobead labeling in green (A) accompanied by D1 (B) and D2 (C) mRNA transcript dots indicated in red and yellow, respectively. The merged image (D) shows heterogeneous overlap of the retrograde beads and mRNA transcripts dots in cells identified using nuclear labeling with DAPI (blue). (E) IMARIS rendering of individual cells from A-D showing colocalization of the beads/dots in the 3D rendered soma. Foot shock had no effect on the total number of cells or number of bead positive cells analyzed (F). The prevalence of D1 and D2 mRNA transcript containing cells was similar between the treatment groups (G). When collapsed across groups (H), it is apparent that the majority of RMTg-projecting dmPFC neurons are D1+ with a large proportion of D1+ neurons also expressing D2 receptor mRNA. Foot shock exposure had no significant effect on the magnitude of either D1 (I) or D2 (J) mRNA expression. Scale bar = 20  $\mu$ m.

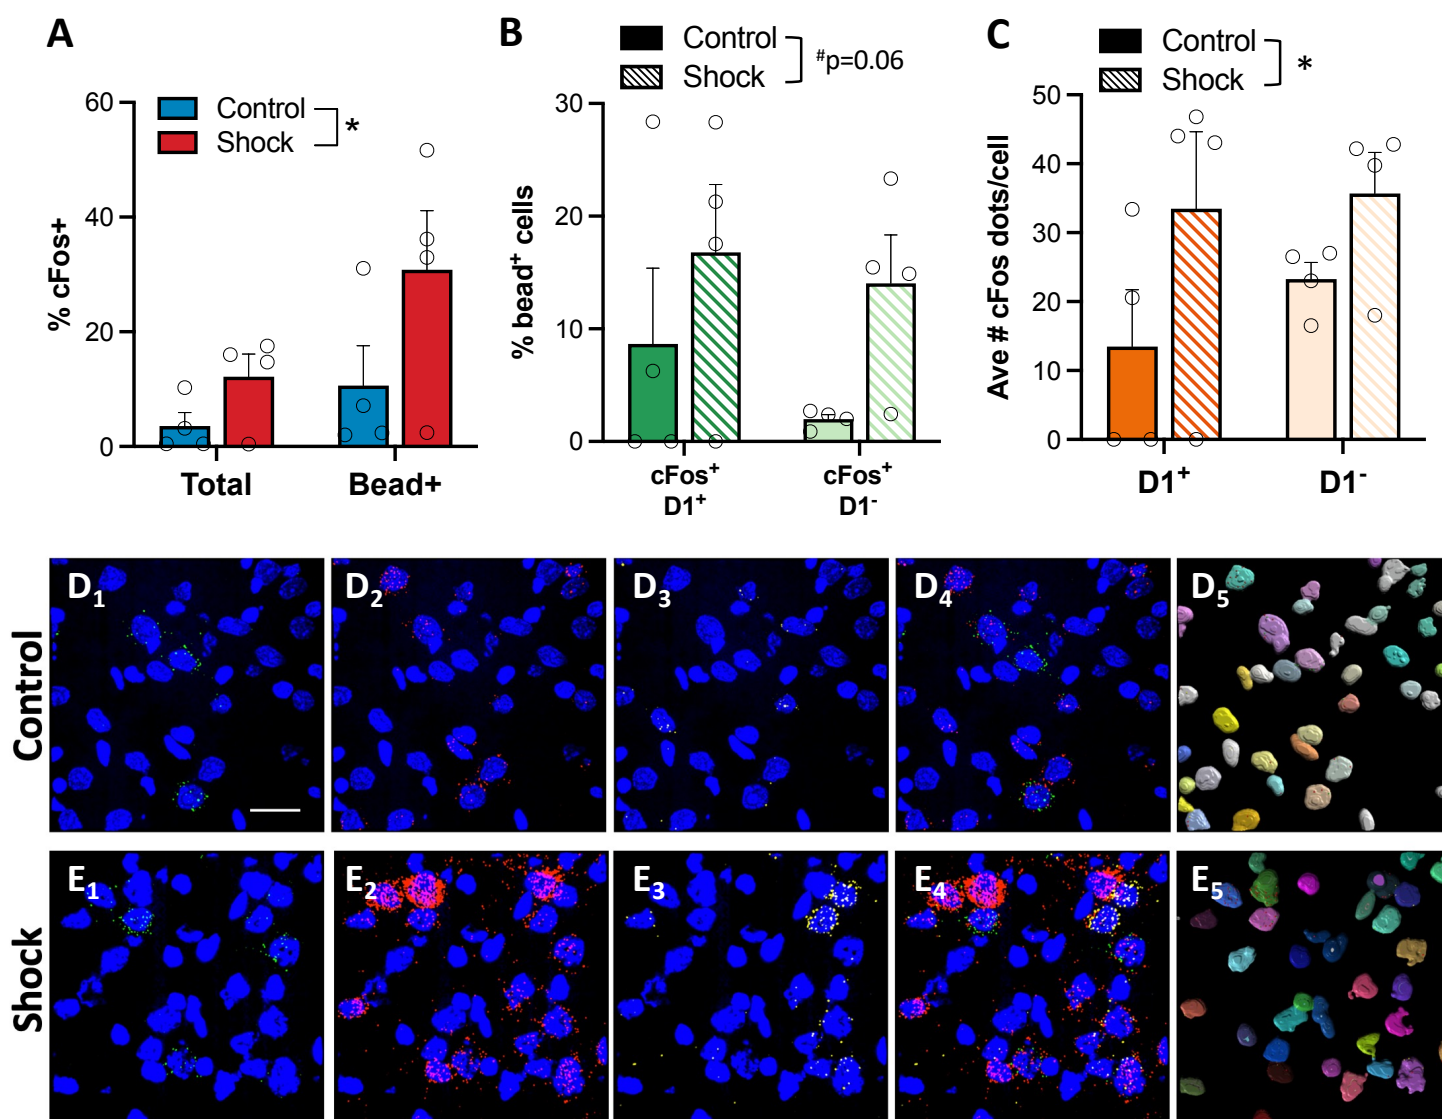

**Figure 9. Shock-induced enhancement of cFos expression occurs in D1<sup>+</sup> and D1<sup>-</sup> RMTg-projecting dmPFC neurons.** (A) Shock exposure significantly increased cFos mRNA expression in both bead<sup>+</sup> and bead<sup>-</sup> dmPFC neurons. (B) cFos expression was similarly increased in both D1<sup>+</sup> and D1<sup>-</sup> neurons in shock-exposed rats relative to controls. (C) cFos mRNA expression was significantly greater in shock-exposed rats compared to controls, but there was no significant difference between D1<sup>+</sup> and D1<sup>-</sup> cell populations. Representative RNAScope labeling from a context-exposed control (D) and shock-exposed (E) rat. Retrobead labeling is depicted in green (D-E<sub>1</sub>), cFos mRNA in red (D-E<sub>2</sub>), D1 receptor mRNA in yellow (D-E<sub>3</sub>), merged image (D-E<sub>4</sub>) and IMARIS rendering of colocalized beads and dots the cell soma (D-E<sub>5</sub>). Nuclear labeling by DAPI depicted in blue. Scale bar = 20  $\mu$ m; \* $p$ ≤0.05.

543 indicate that RMTg afferents arising in the dmPFC are highly enriched in D1 dopamine receptors  
544 (with D2 receptors colocalized to many of these neurons), and that the effects of exposure to  
545 aversive stimuli are similar across dmPFC-RMTg neurons with differing dopamine receptor  
546 expression profiles.

547

## 548 **DISCUSSION**

549 Findings from the present study demonstrate the presence of dense cortical input to the RMTg  
550 spanning the entire rostrocaudal extent of the mPFC, OFC and AIC. The greatest density of  
551 afferents arises from the neurons in the dmPFC. The neurons are primarily D1<sup>+</sup> with a large  
552 proportion also expressing D2 receptor mRNA. RMTg-projecting dmPFC neurons collateralize  
553 extensively in regions critically involved in regulating motivated behavior and flexible decision-  
554 making. Stimulation of dmPFC terminals in the RMTg drives avoidance and exposure to aversive  
555 stimuli induces cFos expression in this neural circuit. Finally, repeated exposure to an aversive  
556 stimulus results in significant alterations in RMTg-projecting dmPFC neurons in the form of  
557 increased excitability and changes in spine neck morphology. Together these data suggest that  
558 dmPFC neurons play an important role in governing the behavioral response to aversive stimuli.

559

560 If anatomical density is any indication of the influence a particular circuit may have over behavior,  
561 our data suggest that mPFC inputs to the RMTg are likely to play, at minimum, an equally  
562 important role in guiding adaptive responding to environmental stimuli as other heavily researched  
563 cortico-subcortical circuits. In a quantitative analysis of cortico-subcortical projection density in  
564 the mPFC, Gabbot et al. (2005) reported that ~8% of layer V PL and IL mPFC neurons project to  
565 the amygdala, whereas raphe- and PAG-projecting mPFC neurons each account for ~1-5% of  
566 neurons in layer V. Despite being sparse relative to PL and IL input to the ventral striatum (~18%),  
567 for example, subsequent work has implicated each of these discrete circuits in crucial aspects of  
568 motivated behavior (e.g., Rozeske et al., 2011; Warden et al., 2012; Bukalo et al., 2015). By

569 comparison, the density of RMTg-projecting PL and IL neurons observed in the current study  
570 (~10%) is one of the denser subcortical projections arising from layer V of the mPFC. A large  
571 body of work has shown that the PL and IL mPFC exert opposing effects on many types of  
572 behavior. For example, PL mPFC neurons facilitate behavioral responding in Pavlovian and  
573 Instrumental assays associated with either appetitive or aversive outcomes, whereas IL mPFC  
574 activity has been shown to facilitate extinction of such behavioral responses (Peters et al., 2009;  
575 Gourley and Taylor, 2016). While the current study showed that stimulation of dmPFC terminals  
576 in the RMTg (which includes the PL subregion) facilitate avoidance, it remains unknown whether  
577 the IL-RMTg projection regulates RMTg signaling in an inverse manner that is similar to what is  
578 often observed when PL and IL mPFC are manipulated at a regional level. Unlike the PL and IL  
579 mPFC, the DP mPFC has been largely neglected with very few studies investigating this region  
580 at either anatomical or functional levels. In one of the few existing DP studies, Kataoka et al (2020)  
581 revealed a role for DP mPFC inputs to the dorsomedial hypothalamus in sympathetic stress  
582 response and stress-induced avoidance of social interactions. Combined with the current  
583 analysis, which reveals a remarkably dense projection from the DP mPFC to the RMTg that  
584 increases to an astonishing degree in the caudal mPFC, these data highlight the need for further  
585 investigation into the role of both the DP mPFC and its connections with the RMTg in aversion.

586  
587 Consideration of collateral input is particularly important when investigating circuit function, as the  
588 possibility that manipulations of circuit activity affect signaling in sites that receive collaterals has  
589 the potential to influence interpretation of results. Using an intersectional, virally-mediated  
590 approach, our data reveal dense collateralization of RMTg-projecting dmPFC neurons to a  
591 number of regions critically involved in motivated behavior. While the extent of collateralization  
592 may be somewhat surprising, this frequently underappreciated aspect of neuronal structure is not  
593 uncommon. Indeed, recent methodological advancements have enabled researchers to map the  
594 extent of a single neuronal projection throughout the brain and demonstrate that collateralization



595 is often widespread (Economo et al., 2016; Kebschull et al., 2016). The current findings indicate  
596 that RMTg-projecting dmPFC neurons collateralize most densely in the dorsal striatum.  
597 Interestingly, dmPFC afferents to the dorsal striatum are well-characterized for their role in guiding  
598 goal-directed behavior (Simmler and Ozawa, 2019) including avoidance (Loewke et al., 2021).  
599 Previous work found that, relative to a number of other cortico-subcortical projections, dmPFC  
600 input to the dorsal striatum was among the densest of projections, comprising ~19% of layer V  
601 neurons (Gabbott et al., 2005). Thus, it is not necessarily surprising that there is overlap in the  
602 population of dorsal striatum-projecting dmPFC neurons and those of other subcortical afferents.  
603 Unexpectedly, terminal density in the RMTg itself was relatively low by comparison to other brain  
604 regions. However, it should be noted that collaterals are often comprised of very thin branches  
605 (Rockland, 2013), and as a result the density measurement obtained in the present study (percent  
606 area stained) may not provide a full picture of the extent of collateralization of this projection. It is  
607 also unclear from the present data whether the observed collateralization was indicative of dense  
608 arborization of a select few dmPFC neurons, or of a high number of dmPFC cells each providing  
609 relatively weak collateral input to a given region. Recent work reporting very little overlap in cell  
610 body labeling between NAc- and RMTg-projecting mPFC neurons using dual retrograde tracer  
611 approach (Cruz et al., 2021) suggests that the former may be the more likely scenario. Additional  
612 experiments using multiple retrograde tracers to examine overlap in dmPFC cell body labeling will  
613 be essential to understand the potential functional implications of synergistic neurotransmission  
614 in regions receiving collateral input. Certainly, the current data present intriguing possibilities for  
615 coordinated signaling across brain regions involved in guiding behavioral responding to  
616 environmental stimuli.

617  
618 The results of the present study also revealed that RMTg-projecting dmPFC neurons are  
619 glutamatergic and predominantly express D1 dopamine receptor mRNA. Of note, D2 receptor  
620 mRNA is also colocalized in the majority of these neurons. These findings agree in large part with

621 existing data showing that D1 receptor expression is greater than that of D2 in the mPFC (Santana  
622 et al., 2009). While D1 and D2 receptor-expressing neurons are often thought of as discrete cell  
623 populations, a number of studies have observed colocalization of both receptors, particularly in  
624 layer V of the mPFC where D2 receptors are most abundant (Vincent et al., 1995; Gaspar et al.,  
625 1995; Santana et al., 2009). Recent work has highlighted the importance of dopaminergic  
626 regulation of cortical control in aversive signaling (Vander Weele et al., 2018; Huang et al., 2020).  
627 Of particular interest is data suggesting that dopamine signaling alters mPFC responses to  
628 aversive stimuli by altering the signal-to-noise ratio of incoming sensory inputs (Vander Weele et  
629 al., 2018). Whether this dopaminergic modulation is circuit- or cell-type specific is not well-  
630 understood. Nevertheless, a rich literature demonstrates that D1 and D2 receptors regulate  
631 behavioral flexibility in complex ways in the mPFC (Floresco and Magyar, 2006). The expression  
632 and function of both receptor subtypes is frequently mechanistically linked to neuropsychiatric  
633 illnesses characterized by deficits in decision-making including schizophrenia, addiction, and  
634 anxiety disorders (Volkow et al., 2004; Perez de la Mora et al., 2012; McCutcheon et al., 2019).  
635 While foot shock exposure did not significantly affect D1 or D2 mRNA expression in dmPFC-  
636 RMTg neurons in the current study, it is possible that repeated or prolonged insults uniquely affect  
637 dopamine receptor modulation of this neural circuit or that other measures of D1/D2 receptor  
638 function not explored in the current study are altered by exposure to aversive stimuli. Thus, the  
639 role that dopaminergic regulation of dmPFC-RMTg circuitry plays in aversive signaling and how  
640 it is altered in models of neuropsychiatric illness present intriguing areas for future investigation.

641  
642 The present study focused on the potential role of dmPFC-RMTg circuit in aversion based on  
643 previous work characterizing the RMTg for its involvement in aversive signaling and the functional  
644 overlap exhibited by the dmPFC. However, some data suggests that PL-RMTg neurons respond  
645 to both aversive and rewarding stimuli (Li et al., 2019a). In addition, recent work suggests that  
646 activity in this neural circuit is particularly crucial when responding to conditioned rather than

647 unconditioned stimuli (Li et al., 2019b; Cruz et al., 2020). It is therefore clear that additional work  
648 is needed to determine the potential diversity of signals encoded by these neurons and how this  
649 information differs across afferents arising from various mPFC subregions (i.e., PL vs IL).

650  
651 Somewhat unexpectedly, exposure to repeated foot shock resulted in a significant decrease in  
652 excitability in RMTg-projecting dmPFC neurons. This contrasts with what has been observed in  
653 LHb neurons, the densest source of input to the RMTg (Jhou et al., 2009b), which exhibit a  
654 significant increase in excitability following a similar foot shock exposure paradigm (Lecca et al.,  
655 2016). Interestingly, the decrease in excitability observed in the present study was accompanied  
656 by significant changes in neck length and diameter of spines localized to the primary apical  
657 dendrites of RMTg-projecting dmPFC neurons. Dendritic spines are the primary recipients of  
658 incoming excitatory signals in pyramidal neurons. Spine neck morphology, in particular, plays a  
659 fundamental role in compartmentalizing electrical and biochemical signals in the head of the  
660 spine. In particular, spine neck diameter has been identified as the single greatest contributor to  
661 such compartmentalization (Tønnesen et al., 2014). In combination with data demonstrating an  
662 inverse relationship between spine neck diameter and excitatory potential (Araya et al., 2014),  
663 our data suggest a potential reduction in the synaptic strength of inputs to RMTg-projecting  
664 dmPFC neurons in shock-exposed rats relative to controls. Although speculative, given the role  
665 that layer V cortical apical dendrites are thought to play in modulating cortical oscillations  
666 (LaBerge and Kasevich, 2013), it is possible that the observed change in spine neck morphology  
667 alters oscillatory frequency in this neuronal population. Altogether, these data suggest a loss of  
668 top-down modulation of RMTg activity following exposure to aversive stimuli. Whether these  
669 physiological and structural adaptations serve to promote adaptive responding to future aversive  
670 stimuli is an important avenue for future exploration.

671



672 In conclusion, the current work presents a fresh perspective on the degree of subregion- and  
673 circuit-specific cortical regulation of RMTg-mediated aversive signaling. These data provide a  
674 strong foundation from which future studies can begin to dissect out the distinct (or  
675 complementary) roles of parallel cortico-subcortical circuits involved in motivated behavior. How  
676 these circuits are altered in models of neuropsychiatric illness will be crucial for understanding  
677 the neural mechanisms underlying disruptions in the balance of neural signals mediating reward  
678 and aversion that is altered in a number of disease states.

679

#### 680 **ACKNOWLEDGEMENTS**

681 The authors thank Joseph Pitock for technical support and Joroen Verharen for sharing the  
682 ImageJ cell density analysis protocol. We are also grateful to Sam Centanni for providing a  
683 detailed protocol for the analysis of the RNAScope data using Imaris Software.

684

685 **REFERENCES**

- 686 Alexander WH, Brown JW (2019) The Role of the Anterior Cingulate Cortex in Prediction Error  
687 and Signaling Surprise. *Top. Cogn. Sci.* 11:119–135
- 688 Araya R, Vogels TP, Yuste R (2014) Activity-dependent dendritic spine neck changes are  
689 correlated with synaptic strength. *Proc. Natl. Acad. Sci. U. S. A.* 111:E2895-2904
- 690 Basu J, Zaremba JD, Cheung SK, Hitti FL, Zemelman BV, Losonczy A, Siegelbaum SA (2016)  
691 Gating of hippocampal activity, plasticity, and memory by entorhinal cortex long-range inhibition.  
692 *Science* 351:aaa5694
- 693 Bukalo O, Pinard CR, Silverstein S, Brehm C, Hartley ND, Whittle N, Colacicco G, Busch E, Patel  
694 S, Singewald N, Holmes A (2015) Prefrontal inputs to the amygdala instruct fear extinction  
695 memory formation. *Sci. Adv.* 1:e1500251
- 696 Burgos-Robles A, Vidal-Gonzalez I, Quirk GJ (2009) Sustained conditioned responses in  
697 prelimbic prefrontal neurons are correlated with fear expression and extinction failure. *J. Neurosci.*  
698 *Off. J. Soc. Neurosci.* 29:8474–8482
- 699 Centanni SW, Morris BD, Luchsinger JR, Bedse G, Fetterly TL, Patel S, Winder DG (2019)  
700 Endocannabinoid control of the insular-bed nucleus of the stria terminalis circuit regulates  
701 negative affective behavior associated with alcohol abstinence. *Neuropsychopharmacol. Off.*  
702 *Publ. Am. Coll. Neuropsychopharmacol.* 44:526–537
- 703 Corbett D, Wise RA (1980) Intracranial self-stimulation in relation to the ascending dopaminergic  
704 systems of the midbrain: a moveable electrode mapping study. *Brain Res.* 185:1–15
- 705 Corcoran KA, Quirk GJ (2007) Activity in prelimbic cortex is necessary for the expression of  
706 learned, but not innate, fears. *J. Neurosci. Off. J. Soc. Neurosci.* 27:840–844
- 707 Cruz AM, Kim TH, Smith RJ (2021) Monosynaptic Retrograde Tracing From Prelimbic Neuron  
708 Subpopulations Projecting to Either Nucleus Accumbens Core or Rostromedial Tegmental  
709 Nucleus. *Front. Neural Circuits* 15:639733
- 710 Cruz AM, Spencer HF, Kim TH, Jhou TC, Smith RJ (2020) Prelimbic cortical projections to  
711 rostromedial tegmental nucleus play a suppressive role in cue-induced reinstatement of cocaine  
712 seeking. *Neuropsychopharmacol. Off. Publ. Am. Coll. Neuropsychopharmacol.*
- 713 Do-Monte FH, Manzano-Nieves G, Quiñones-Laracuenta K, Ramos-Medina L, Quirk GJ (2015)  
714 Revisiting the role of infralimbic cortex in fear extinction with optogenetics. *J. Neurosci. Off. J.*  
715 *Soc. Neurosci.* 35:3607–3615
- 716 Economo MN, Clack NG, Lavis LD, Gerfen CR, Svoboda K, Myers EW, Chandrashekar J (2016)  
717 A platform for brain-wide imaging and reconstruction of individual neurons. *eLife* 5:e10566
- 718 Elmer GI, Palacorolla H, Mayo CL, Brown PL, Jhou TC, Brady D, Shepard PD (2019) The  
719 rostromedial tegmental nucleus modulates the development of stress-induced helpless behavior.  
720 *Behav. Brain Res.* 359:950–957

- 721 Floresco SB (2013) Prefrontal dopamine and behavioral flexibility: shifting from an “inverted-U”  
722 toward a family of functions. *Front. Neurosci.* 7:62
- 723 Floresco SB, Magyar O (2006) Mesocortical dopamine modulation of executive functions: beyond  
724 working memory. *Psychopharmacology (Berl.)* 188:567–585
- 725 Gabbott PLA, Warner TA, Jays PRL, Salway P, Busby SJ (2005) Prefrontal cortex in the rat:  
726 projections to subcortical autonomic, motor, and limbic centers. *J. Comp. Neurol.* 492:145–177
- 727 Gaspar P, Bloch B, Le Moine C (1995) D1 and D2 receptor gene expression in the rat frontal  
728 cortex: cellular localization in different classes of efferent neurons. *Eur. J. Neurosci.* 7:1050–1063
- 729 Glover EJ, McDougale MJ, Siegel GS, Jhou TC, Chandler LJ (2016) Role for the Rostromedial  
730 Tegmental Nucleus in Signaling the Aversive Properties of Alcohol. *Alcohol. Clin. Exp. Res.*  
731 40:1651–1661
- 732 Gourley SL, Taylor JR (2016) Going and stopping: Dichotomies in behavioral control by the  
733 prefrontal cortex. *Nat. Neurosci.* 19:656–664
- 734 Hong S, Jhou TC, Smith M, Saleem KS, Hikosaka O (2011) Negative reward signals from the  
735 lateral habenula to dopamine neurons are mediated by rostromedial tegmental nucleus in  
736 primates. *J. Neurosci.* 31:11457–11471
- 737 Huang S, Zhang Z, Gambeta E, Xu SC, Thomas C, Godfrey N, Chen L, M’Dahoma S, Borgland  
738 SL, Zamponi GW (2020) Dopamine Inputs from the Ventral Tegmental Area into the Medial  
739 Prefrontal Cortex Modulate Neuropathic Pain-Associated Behaviors in Mice. *Cell Rep.* 33:108393
- 740 Jhou TC, Fields HL, Baxter MG, Saper CB, Holland PC (2009)(a) The rostromedial tegmental  
741 nucleus (RMTg), a GABAergic afferent to midbrain dopamine neurons, encodes aversive stimuli  
742 and inhibits motor responses. *Neuron* 61:786–800
- 743 Jhou TC, Geisler S, Marinelli M, Degarmo BA, Zahm DS (2009)(b) The mesopontine rostromedial  
744 tegmental nucleus: A structure targeted by the lateral habenula that projects to the ventral  
745 tegmental area of Tsai and substantia nigra compacta. *J. Comp. Neurol.* 513:566–596
- 746 Kataoka N, Shima Y, Nakajima K, Nakamura K (2020) A central master driver of psychosocial  
747 stress responses in the rat. *Science* 367:1105–1112
- 748 Kaufling J, Veinante P, Pawlowski SA, Freund-Mercier M-J, Barrot M (2009) Afferents to the  
749 GABAergic tail of the ventral tegmental area in the rat. *J. Comp. Neurol.* 513:597–621
- 750 Keschull JM, Garcia da Silva P, Reid AP, Peikon ID, Albeanu DF, Zador AM (2016) High-  
751 Throughput Mapping of Single-Neuron Projections by Sequencing of Barcoded RNA. *Neuron*  
752 91:975–987
- 753 Kupferschmidt DA, Cody PA, Lovinger DM, Davis MI (2015) Brain BLAQ: Post-hoc thick-section  
754 histochemistry for localizing optogenetic constructs in neurons and their distal terminals. *Front.*  
755 *Neuroanat.* 9:6
- 756 LaBerge D, Kasevich R (2013) The cognitive significance of resonating neurons in the cerebral  
757 cortex. *Conscious. Cogn.* 22:1523–1550

- 758 Lecca S, Pelosi A, Tchenio A, Moutkine I, Lujan R, Hervé D, Mameli M (2016) Rescue of GABAB  
759 and GIRK function in the lateral habenula by protein phosphatase 2A inhibition ameliorates  
760 depression-like phenotypes in mice. *Nat. Med.* 22:254–261
- 761 Lee AT, Vogt D, Rubenstein JL, Sohal VS (2014) A Class of GABAergic Neurons in the Prefrontal  
762 Cortex Sends Long-Range Projections to the Nucleus Accumbens and Elicits Acute Avoidance  
763 Behavior. *J. Neurosci.* 34:11519–11525
- 764 Li H, Pullmann D, Cho JY, Eid M, Jhou TC (2019)(a) Generality and opponency of rostromedial  
765 tegmental (RMTg) roles in valence processing. *eLife* 8
- 766 Li H, Vento PJ, Parrilla-Carrero J, Pullmann D, Chao YS, Eid M, Jhou TC (2019)(b) Three  
767 Rostromedial Tegmental Afferents Drive Triply Dissociable Aspects of Punishment Learning and  
768 Aversive Valence Encoding. *Neuron*
- 769 Loewke AC, Minerva AR, Nelson AB, Kreitzer AC, Gunaydin LA (2021) Frontostriatal Projections  
770 Regulate Innate Avoidance Behavior. *J. Neurosci. Off. J. Soc. Neurosci.* 41:5487–5501
- 771 Matsumoto M, Hikosaka O (2007) Lateral habenula as a source of negative reward signals in  
772 dopamine neurons. *Nature* 447:1111–1115
- 773 McCutcheon RA, Abi-Dargham A, Howes OD (2019) Schizophrenia, Dopamine and the Striatum:  
774 From Biology to Symptoms. *Trends Neurosci.* 42:205–220
- 775 McGuier NS, Padula AE, Lopez MF, Woodward JJ, Mulholland PJ (2015) Withdrawal from chronic  
776 intermittent alcohol exposure increases dendritic spine density in the lateral orbitofrontal cortex of  
777 mice. *Alcohol Fayettev. N* 49:21–27
- 778 Mena-Segovia J, Bolam JP (2017) Rethinking the Pedunculo-pontine Nucleus: From Cellular  
779 Organization to Function. *Neuron* 94:7–18
- 780 National Research Council (2011) Guide for the Care and Use of Laboratory Animals: Eighth  
781 Edition 8th ed. Washington DC: National Academies Press.
- 782 Nieh EH, Matthews GA, Allsop SA, Presbrey KN, Leppla CA, Wichmann R, Neve R, Wildes CP,  
783 Tye KM (2015) Decoding neural circuits that control compulsive sucrose seeking. *Cell* 160:528–  
784 541
- 785 Omelchenko N, Bell R, Sesack SR (2009) Lateral habenula projections to dopamine and GABA  
786 neurons in the rat ventral tegmental area. *Eur. J. Neurosci.* 30:1239–1250
- 787 Paxinos G, Watson C (2007) *The Rat Brain in Stereotaxic Coordinates, Sixth Edition: Hard Cover*  
788 *Edition 6 edition.* Amsterdam ; Boston: Academic Press.
- 789 Perez de la Mora M, Gallegos-Cari A, Crespo-Ramirez M, Marcellino D, Hansson AC, Fuxe K  
790 (2012) Distribution of dopamine D(2)-like receptors in the rat amygdala and their role in the  
791 modulation of unconditioned fear and anxiety. *Neuroscience* 201:252–266
- 792 Peters J, Kalivas PW, Quirk GJ (2009) Extinction circuits for fear and addiction overlap in  
793 prefrontal cortex. *Learn. Mem. Cold Spring Harb. N* 16:279–288

- 794 Rock C, Zurita H, Lebbby S, Wilson CJ, Apicella AJ (2018) Cortical Circuits of Callosal GABAergic  
795 Neurons. *Cereb. Cortex N. Y. N* 1991 28:1154–1167
- 796 Rockland KS (2013) Collateral branching of long-distance cortical projections in monkey. *J.*  
797 *Comp. Neurol.* 521:4112–4123
- 798 Rozeske RR, Evans AK, Frank MG, Watkins LR, Lowry CA, Maier SF (2011) Uncontrollable, But  
799 Not Controllable, Stress Desensitizes 5-HT<sub>1A</sub> Receptors in the Dorsal Raphe Nucleus. *J.*  
800 *Neurosci.* 31:14107–14115
- 801 Santana N, Mengod G, Artigas F (2009) Quantitative analysis of the expression of dopamine D1  
802 and D2 receptors in pyramidal and GABAergic neurons of the rat prefrontal cortex. *Cereb. Cortex*  
803 *N. Y. N* 1991 19:849–860
- 804 Schultz W (1986) Responses of midbrain dopamine neurons to behavioral trigger stimuli in the  
805 monkey. *J. Neurophysiol.* 56:1439–1461
- 806 Schultz W, Dayan P, Montague PR (1997) A neural substrate of prediction and reward. *Science*  
807 275:1593–1599
- 808 Sharpe MJ, Marchant NJ, Whitaker LR, Richie CT, Zhang YJ, Campbell EJ, Koivula PP,  
809 Necarsulmer JC, Mejias-Aponte C, Morales M, Pickel J, Smith JC, Niv Y, Shaham Y, Harvey BK,  
810 Schoenbaum G (2017) Lateral Hypothalamic GABAergic Neurons Encode Reward Predictions  
811 that Are Relayed to the Ventral Tegmental Area to Regulate Learning. *Curr. Biol. CB* 27:2089-  
812 2100.e5
- 813 Simmler LD, Ozawa T (2019) Neural circuits in goal-directed and habitual behavior: Implications  
814 for circuit dysfunction in obsessive-compulsive disorder. *Neurochem. Int.* 129:104464
- 815 St Laurent R, Martinez Damonte V, Tsuda AC, Kauer JA (2020) Periaqueductal Gray and  
816 Rostromedial Tegmental Inhibitory Afferents to VTA Have Distinct Synaptic Plasticity and Opiate  
817 Sensitivity. *Neuron* 106:624-636.e4
- 818 Stamatakis AM, Stuber GD (2012) Activation of lateral habenula inputs to the ventral midbrain  
819 promotes behavioral avoidance. *Nat. Neurosci.* Available at:  
820 <http://www.ncbi.nlm.nih.gov/pubmed/22729176> [Accessed June 30, 2012].
- 821 Sun Y, Cao J, Xu C, Liu X, Wang Z, Zhao H (2020) Rostromedial tegmental nucleus-substantia  
822 nigra pars compacta circuit mediates aversive and despair behavior in mice. *Exp. Neurol.*  
823 333:113433
- 824 Tønnesen J, Katona G, Rózsa B, Nägerl UV (2014) Spine neck plasticity regulates  
825 compartmentalization of synapses. *Nat. Neurosci.* 17:678–685
- 826 Vander Weele CM, Siciliano CA, Matthews GA, Namburi P, Izadmehr EM, Espinel IC, Nieh EH,  
827 Schut EHS, Padilla-Coreano N, Burgos-Robles A, Chang C-J, Kimchi EY, Beyeler A, Wichmann  
828 R, Wildes CP, Tye KM (2018) Dopamine enhances signal-to-noise ratio in cortical-brainstem  
829 encoding of aversive stimuli. *Nature* 563:397–401
- 830 Vincent SL, Khan Y, Benes FM (1995) Cellular colocalization of dopamine D1 and D2 receptors  
831 in rat medial prefrontal cortex. *Synap. N. Y. N* 19:112–120

832 Volkow ND, Fowler JS, Wang G-J (2004) The addicted human brain viewed in the light of imaging  
833 studies: brain circuits and treatment strategies. *Neuropharmacology* 47:3–13

834 Warden MR, Selimbeyoglu A, Mirzabekov JJ, Lo M, Thompson KR, Kim S-Y, Adhikari A, Tye KM,  
835 Frank LM, Deisseroth K (2012) A prefrontal cortex-brainstem neuronal projection that controls  
836 response to behavioural challenge. *Nature* 492:428–432

837 Wayman WN, Woodward JJ (2018) Exposure to the Abused Inhalant Toluene Alters Medial  
838 Prefrontal Cortex Physiology. *Neuropsychopharmacol. Off. Publ. Am. Coll.*  
839 *Neuropsychopharmacol.* 43:912–924

840



841 **FIGURE LEGENDS**

842 **Figure 1. Anatomical distribution of cortical inputs to the RMTg. (A)** Representative images  
843 demonstrating dense ipsilateral cortical labeling in brain areas injected with CtB into the RMTg.  
844 **(B)** Representative high magnification image showing that inputs to the RMTg arise primarily from  
845 layer V of the mPFC. **(C)** The percent of CtB+ neurons relative to all layer V NeuN+ neurons is  
846 relatively consistent across ACC, PL, and IL subregions of the mPFC whereas the density of  
847 RMTg-projecting DP mPFC neurons increases substantially at more caudal levels. **(D)**  
848 Contralateral cortical afferents are substantially less dense than ipsilateral inputs as exemplified  
849 by a comparison of RMTg-projecting PL mPFC neurons in both hemispheres. **(E)** The density of  
850 layer V OFC neurons projecting to the RMTg is similar to that observed in the mPFC with LO  
851 inputs diminishing at more caudal levels. **(F)** CtB labeling is consistently observed in the AIC,  
852 albeit to a lesser degree than that observed in mPFC and OFC. **(G)** Map of tracer injection sites  
853 for all animals included in quantification. **(H)** Representative injection site. Abbreviations: ACC =  
854 anterior cingulate cortex; AID = agranular insular cortex, dorsal; AIV = agranular insular cortex,  
855 ventral; DI = dysgranular insular cortex; DLO = dorsolateral orbitofrontal cortex; DP =  
856 dorsopeduncular cortex; GI = granular insular cortex; IL = infralimbic cortex; LO = lateral  
857 orbitofrontal cortex; MO = medial orbitofrontal cortex; PL = prelimbic cortex; VO = ventral  
858 orbitofrontal cortex.

859

860 **Figure 2. RMTg-projecting dmPFC neurons express CaMKII $\alpha$ .** Representative mPFC images  
861 co-labeled for **(A<sub>1-3</sub>)** the glutamatergic marker CaMKII $\alpha$  (red) and CtB (blue) and the **(B<sub>1-3</sub>)**  
862 GABAergic marker GAD67 (green) and CtB (blue) from rat injected with CtB into the RMTg. **(C)**  
863 Quantification of co-labeling reveals that RMTg-projecting neurons are CaMKII $\alpha$ +. Scale bar = 25  
864  $\mu$ m.

865

866 **Figure 3. RMTg-projecting dmPFC neurons collateralize throughout the brain. (A)** An  
867 intersectional dual-virus approach was used to fill RMTg-projecting dmPFC neurons with yellow  
868 fluorescent protein (YFP). **(B)** Representative images showing RMTg-projecting dmPFC neurons  
869 filled with YFP following amplification using standard immunohistochemistry. **(C)** Quantification of  
870 the average percent-stained area within regions of interest placed within the respective brain  
871 regions. **(D)** Representative YFP staining in the amygdala shows relatively sparse collateralization  
872 of RMTg-projecting dmPFC neurons in the basolateral nucleus. **(E)** Representative YFP staining  
873 in the striatum shows dense collateralization in the dorsomedial but not dorsolateral striatum.  
874 Scale bar = 100  $\mu$ m

875  
876 **Figure 4. Optogenetic stimulation of RMTg-projecting dmPFC terminals drives avoidance.**  
877 **(A)** Representative ChR2 expression in dmPFC. **(B)** Rats spend significantly less time relative to  
878 chance in the light-paired side of a two-compartment chamber during initial testing (test 1) and  
879 when the light-paired compartment is reversed (test 2) when light delivery results in stimulation of  
880 dmPFC terminals in the RMTg. **(C)** A similar degree of avoidance of the light-paired chamber is  
881 observed upon stimulation of lateral habenula inputs to the RMTg. **(D)** Unlike stimulation of  
882 dmPFC terminals in the RMTg, stimulation of dmPFC terminals in the VTA fails to produce either  
883 preference for or avoidance of the light-paired compartment. **(E)** Direct comparison of circuit  
884 manipulations reveals significant avoidance when stimulating inputs to the RMTg relative to the  
885 VTA. Light-paired side indicated by blue bar in representative maps above each dataset. \* $p \leq 0.01$ ,  
886 scale bar = 1000  $\mu$ m.

887  
888 **Figure 5. cFos induction in RMTg-projecting dmPFC neurons following exposure to**  
889 **aversive stimuli. (A)** Experimental procedures. **(B)** Rats that had tone paired with foot shock  
890 delivery displayed significantly more freezing behavior in response to tone presentation than rats  
891 that were exposed to the same number of tone-shock presentations but in an unpaired manner.

892 **(C)** Significantly greater cFos expression was observed in RMTg-projecting dmPFC neurons  
893 (CtB+) following exposure to either a series of foot shocks or a tone predictive of foot shock  
894 relative to a neutral tone or the testing context alone. **(D)** Representative images of CtB and cFos  
895 labeling in the dmPFC of a context-exposed rat and a rat exposed to foot shock. CtB<sup>+</sup>/cFos<sup>-</sup>  
896 neurons are indicated with a yellow arrowhead; CtB<sup>-</sup>/cFos<sup>+</sup> neurons are indicated with a black  
897 arrow; CtB<sup>+</sup>/cFos<sup>+</sup> neurons are indicated by a red asterisk. Scale bar = 200  $\mu$ m.

898

899 **Figure 6. Decreased excitability in RMTg-projecting dmPFC neurons following exposure to**  
900 **aversive stimuli. (A)** Experimental preparation. **(B)** Significantly fewer spikes were observed in  
901 shock-exposed rats relative to controls in current clamp recordings of retrobead-labeled dmPFC  
902 neurons. **(C)** Representative traces from a control and shock-exposed rat. Decreased spiking was  
903 associated with a significant increase in **(D)** rheobase, **(G)** membrane capacitance, and **(H)** peak  
904 action potential amplitude as well as a significant decrease in **(F)** membrane resistance and **(I)**  
905 action potential half-width. No significant difference was observed in **(E)** action potential threshold  
906 or **(J)** after-hyperpolarization. **(K)** Representative retrobead injection site in the RMTg. \* $p \leq 0.05$ ,  
907 scale bar = 1000  $\mu$ m.

908

909 **Figure 7. Exposure to aversive stimuli increases spine neck diameter in RMTg-projecting**  
910 **dmPFC neurons. (A)** An intersectional dual-virus approach was used to fill RMTg-projecting  
911 dmPFC neurons with yellow fluorescent protein (YFP). **(B)** Representative YFP-filled primary  
912 apical dendrites in the dmPFC and accompanying Imaris renderings for context- and shock-  
913 exposed rats. **(C)** Spine density did not differ between groups regardless of subclass. However,  
914 shock-exposed rats exhibited significantly greater spine neck diameter **(D)** and shorter spine  
915 length **(E)** across all subtypes (main effect of shock) relative to rats exposed to the neutral testing  
916 context. \* $p \leq 0.05$ ; scale bar = 5  $\mu$ m

917

918 **Figure 8. D1 & D2 receptor gene expression in RMTg-projecting dmPFC neurons. (A-E)**  
919 Representative labeling in dmPFC neurons shows dense retrobead labeling in green **(A)**  
920 accompanied by D1 **(B)** and D2 **(C)** mRNA transcript dots indicated in red and yellow,  
921 respectively. The merged image **(D)** shows heterogeneous overlap of the retrograde beads and  
922 mRNA transcripts dots in cells identified using nuclear labeling with DAPI (blue). **(E)** Imaris  
923 rendering of individual cells from A-D showing colocalization of the beads/dots in the 3D rendered  
924 soma. Foot shock had no effect on the total number of cells or number of bead positive cells  
925 analyzed **(F)**. The prevalence of D1 and D2 mRNA transcript containing cells was similar between  
926 the treatment groups **(G)**. When collapsed across groups **(H)**, it is apparent that the majority of  
927 RMTg-projecting dmPFC neurons are D1+ with a large proportion of D1+ neurons also expressing  
928 D2 receptor mRNA. Foot shock exposure had no significant effect on the magnitude of either D1  
929 **(I)** or D2 **(J)** mRNA expression. Scale bar = 20  $\mu$ m

930

931 **Figure 9. Shock-induced enhancement of cFos expression occurs in D1<sup>+</sup> and D1<sup>-</sup> RMTg-**  
932 **projecting dmPFC neurons. (A)** Shock exposure significantly increased cFos mRNA expression  
933 in both bead<sup>+</sup> and bead<sup>-</sup> dmPFC neurons. **(B)** cFos expression was similarly increased in both  
934 D1<sup>+</sup> and D1<sup>-</sup> neurons in shock-exposed rats relative to controls. **(C)** cFos mRNA expression was  
935 significantly greater in shock-exposed rats compared to controls, but there was no significant  
936 difference between D1<sup>+</sup> and D1<sup>-</sup> cell populations. Representative RNAScope labeling from a  
937 context-exposed control **(D)** and shock-exposed **(E)** rat. Retrobead labeling is depicted in green  
938 **(D-E<sub>1</sub>)**, cFos mRNA in red **(D-E<sub>2</sub>)**, D1 receptor mRNA in yellow **(D-E<sub>3</sub>)**, merged image **(D-E<sub>4</sub>)** and  
939 Imaris rendering of colocalized beads and dots the cell soma **(D-E<sub>5</sub>)**. Nuclear labeling by DAPI  
940 depicted in blue. Scale bar = 20  $\mu$ m; \*p $\leq$ 0.05

| Measure                          | Statistical test | Effect            | Result                            |
|----------------------------------|------------------|-------------------|-----------------------------------|
| Dendrite diameter                | Unpaired t-test  |                   | t(10)=0.6430, p=0.3960            |
| Dendrite volume                  | Unpaired t-test  |                   | t(10)=0.3731, p=0.1613            |
| Overall spine density            | Unpaired t-test  |                   | t(10)=0.2997, p=0.4101            |
| Spine density by class           | Two-way ANOVA    | Class             | <b>F(3,40)=53.37, p&lt;0.0001</b> |
|                                  |                  | Treatment         | F(1,40)=0.0750, p=0.7856          |
|                                  |                  | Class x Treatment | F(3,40)=1.338, p=0.2756           |
| Spine length by class            | Two-way ANOVA    | Class             | <b>F(3,36)=224.7, p&lt;0.0001</b> |
|                                  |                  | Treatment         | F(1,36)=1.427, p=0.2401           |
|                                  |                  | Class x Treatment | F(3,36)=1.573, p=0.2129           |
| Spine diameter by class          | Two-way ANOVA    | Class             | <b>F(3,36)=23.77, p&lt;0.0001</b> |
|                                  |                  | Treatment         | F(1,36)=2.492, p=0.1232           |
|                                  |                  | Class x Treatment | F(3,36)=0.8049, p=0.4994          |
| Terminal point diameter by class | Two-way ANOVA    | Class             | <b>F(3,36)=13.77, p&lt;0.0001</b> |
|                                  |                  | Treatment         | F(1,36)=0.0579, p=0.8112          |
|                                  |                  | Class x Treatment | F(3,36)=0.0967, p=0.9614          |
| Spine volume by class            | Two-way ANOVA    | Class             | <b>F(3,36)=15.89, p&lt;0.0001</b> |
|                                  |                  | Treatment         | F(1,36)=1.832, p=0.1843           |
|                                  |                  | Class x Treatment | F(3,36)=0.7693, p=0.5188          |
| Spine neck volume by class       | Two-way ANOVA    | Class             | <b>F(3,36)=18.86, p&lt;0.0001</b> |
|                                  |                  | Treatment         | F(1,36)=2.404, p=0.1298           |
|                                  |                  | Class x Treatment | F(3,36)=0.9704, p=0.4173          |
| Terminal point volume by class   | Two-way ANOVA    | Class             | <b>F(3,36)=5.712, p=0.0026</b>    |
|                                  |                  | Treatment         | F(1,36)=0.9216, p=0.3435          |
|                                  |                  | Class x Treatment | F(3,36)=0.6379, p=0.5955          |
| Neck length by class             | Two-way ANOVA    | Class             | <b>F(3,29)=180.6, p&lt;0.0001</b> |
|                                  |                  | Treatment         | <b>F(1,29)=4.190, p=0.0498</b>    |
|                                  |                  | Class x Treatment | <b>F(3,29)=3.179, p=0.0388</b>    |
| Neck diameter by class           | Two-way ANOVA    | Class             | <b>F(3,33)=27.33, p&lt;0.0001</b> |
|                                  |                  | Treatment         | <b>F(1,33)=9.847, p=0.0036</b>    |
|                                  |                  | Class x Treatment | F(3,33)=1.689, p=0.1884           |

**Table S1. Complete analysis of dendritic spine density & morphology in RMTg-projecting dmPFC neurons following exposure to aversive stimuli.** Bolded results indicate statistical significance of  $p \leq 0.05$ .
